# Supplementary material for: Dermacozine N, the First Natural Linear Pentacyclic Oxazinophenazine with UV–Vis Absorption Maxima in the Near Infrared Region, along with Dermacozines O and P Isolated from the Mariana Trench Sediment Strain Dermacoccus abyssi MT 1.1T
Source: MDPI journal article supplement (doi:10.3390/md19060325), 2021-06-03
Supplement: s1 [file s1]

## Supporting Information

### **Dermacozine N, the First Natural Linear Pentacyclic Oxazinophenazine with UV-Vis Absorption Maxima in the Near Infrared Region, along with Dermacozines O and P Isolated from the Mariana Trench Sediment Strain *Dermacoccus abyssi* MT 1.1<sup>T</sup>**

**Bertalan Juhasz <sup>1</sup>, Dawrin Pech-Puch <sup>2</sup>, Jioji N. Tabudravu <sup>3</sup>, Bastien Cautain <sup>4</sup>, Fernando Reyes <sup>4</sup>, Carlos Jiménez <sup>5</sup>, Kwaku Kyeremeh <sup>6</sup> and Marcel Jaspars <sup>1\*</sup>**

<sup>1</sup> Marine Biodiscovery Centre, Department of Chemistry, University of Aberdeen, Old Aberdeen, Scotland, AB24 3UE, UK; r01bj16@abdn.ac.uk

<sup>2</sup> Departamento de Biología Marina, Universidad Autónoma de Yucatán, Km. 15.5, carretera Mérida-Xmatkuil, A.P. 4-116 Itzimná, C.P. 97100 Mérida, Yucatán, México; dawrin.j.zech@udc.es

<sup>3</sup> School of Natural Sciences, Faculty of Science and Technology, University of Central Lancashire, Preston, PR1 2HE, UK; JTabudravu@uclan.ac.uk

<sup>4</sup> Fundación MEDINA, Centro de Excelencia en Investigación de Medicamentos Innovadores en Andalucía Avda. del Conocimiento 34, Edificio Centro de Desarrollo Farmacéutico y Alimentario, Parque Tecnológico de Ciencias de la Salud 18016 Granada, Spain; cautainbastien@gmail.com (B.C.); fernando.reyes@medinaandalucia.es (F.R.)

<sup>5</sup> Centro de Investigacións Científicas Avanzadas (CICA) e Departamento de Química, Facultade de Ciencias, AE CICA-INIBIC, Universidade da Coruña, 15071 A Coruña, Spain; carlos.jimenez@udc.es

<sup>6</sup> Marine and Plant Research Laboratory of Ghana, Department of Chemistry, School of Physical and Mathematical Sciences, University of Ghana, P.O. Box LG 56, Legon-Accra, Ghana; kkyeremeh@ug.edu.gh

\* Correspondence: m.jaspars@abdn.ac.uk, Tel.: +44-1224-272-895

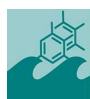

## Contents

|                                                                                                                                                                                                                                                                                                                                                                                |    |
|--------------------------------------------------------------------------------------------------------------------------------------------------------------------------------------------------------------------------------------------------------------------------------------------------------------------------------------------------------------------------------|----|
| <b>Figure S1.</b> LC-MS analysis of dermacozine N (1) (qTOF, Bruker).....                                                                                                                                                                                                                                                                                                      | 6  |
| <b>Figure S2.</b> MS/MS of dermacozine N (1) (qTOF, Bruker) .....                                                                                                                                                                                                                                                                                                              | 6  |
| <b>Figure S3A.</b> Proposed MS fragmentation pathway of dermacozine N (1) showing loss of a (-ON(C <sub>6</sub> H <sub>4</sub> )-) fragment. ....                                                                                                                                                                                                                              | 7  |
| <b>Figure S3B.</b> Mass Error between the calculated (Chemdraw modelled) and experimental (qTOF) <i>m/z</i> ratio of dermacozine N (1) .....                                                                                                                                                                                                                                   | 7  |
| <b>Figure S4.</b> UV-Vis spectrum of dermacozine N (1) in EtOH.....                                                                                                                                                                                                                                                                                                            | 8  |
| <b>Figure S6.</b> Dermacozine N (1) <sup>1</sup> H-NMR spectrum (800 MHz, DMSO- <i>d</i> <sub>6</sub> ).....                                                                                                                                                                                                                                                                   | 9  |
| <b>Figure S7.</b> <sup>1</sup> H- <sup>13</sup> C HSQC spectrum of dermacozine N (1) (800 MHz, DMSO- <i>d</i> <sub>6</sub> ).....                                                                                                                                                                                                                                              | 9  |
| <b>Figure S8.</b> <sup>1</sup> H- <sup>13</sup> C HMBC (magnitude mode) spectrum of dermacozine N (1) (800 MHz, DMSO- <i>d</i> <sub>6</sub> ) Inlets show the H-2 to C-11 carbonyl correlation (top left, phase sensitive mode), the <i>ortho</i> -substituted D-ring (top right, magnitude mode) and N-methyl C4a, C5a correlation (bottom right, phase sensitive mode) ..... | 10 |
| <b>Figure S9.</b> <sup>1</sup> H- <sup>13</sup> C HMBC spectrum of dermacozine N (1) with 2 Hz Coupling (800 MHz, DMSO- <i>d</i> <sub>6</sub> ).....                                                                                                                                                                                                                           | 10 |
| <b>Figure S10.</b> <sup>1</sup> H- <sup>1</sup> H COSY spectrum of dermacozine N (1) (800 MHz, DMSO- <i>d</i> <sub>6</sub> ) .....                                                                                                                                                                                                                                             | 11 |
| <b>Figure S11.</b> <sup>1</sup> H- <sup>1</sup> H NOESY spectrum of dermacozine N (1) (800 MHz, DMSO- <i>d</i> <sub>6</sub> ) (Inlets show the N-methyl and H-4 (top), and NH <sub>2</sub> -12 to H-9 (middle and lower) correlations) .....                                                                                                                                   | 12 |
| <b>Figure S12.</b> <sup>1</sup> H- <sup>15</sup> N HMBC spectrum of dermacozine N (1) (800 MHz, DMSO- <i>d</i> <sub>6</sub> ) .....                                                                                                                                                                                                                                            | 13 |
| <b>Figure S13.</b> LC-MS analysis of dermacozine O (2) (qTOF, Bruker).....                                                                                                                                                                                                                                                                                                     | 13 |
| <b>Figure S14.</b> UV-Vis spectrum of dermacozine O (2) in EtOH.....                                                                                                                                                                                                                                                                                                           | 14 |
| <b>Figure S15.</b> IR spectrum of dermacozine O (2) in EtOH.....                                                                                                                                                                                                                                                                                                               | 14 |
| <b>Figure S16.</b> <sup>1</sup> H-NMR spectrum of dermacozine O (2) (800 MHz, DMSO- <i>d</i> <sub>6</sub> ).....                                                                                                                                                                                                                                                               | 15 |
| <b>Figure S17.</b> <sup>1</sup> H- <sup>13</sup> C HSQC spectrum of dermacozine O (2) (800 MHz, DMSO- <i>d</i> <sub>6</sub> ) .....                                                                                                                                                                                                                                            | 15 |
| <b>Figure S18.</b> <sup>1</sup> H- <sup>13</sup> C HMBC spectrum of dermacozine O (2) (800 MHz, DMSO- <i>d</i> <sub>6</sub> ) (Inlets show NH-14 and C-6, C-16 correlations (top), N-methyl hydrogen atom to C4a and C5a correlations (middle), H2 to C-11 carbonyl correlation (bottom)) .....                                                                                | 16 |
| <b>Figure S19.</b> Long Range <sup>1</sup> H- <sup>13</sup> C HMBC correlations of Dermacozine O (2) with <i>J</i> = 2Hz (800 MHz, DMSO- <i>d</i> <sub>6</sub> ) .....                                                                                                                                                                                                         | 16 |
| <b>Figure S20.</b> <sup>1</sup> H- <sup>1</sup> H COSY spectrum of dermacozine O (2) (800 MHz, DMSO- <i>d</i> <sub>6</sub> ) .....                                                                                                                                                                                                                                             | 17 |

|                                                                                                                                                                                                                        |    |
|------------------------------------------------------------------------------------------------------------------------------------------------------------------------------------------------------------------------|----|
| <b>Figure S21.</b> $^1\text{H}$ - $^{15}\text{N}$ HMBC spectrum of dermacozine O (2) (800 MHz, $\text{DMSO}-d_6$ ).....                                                                                                | 17 |
| <b>Figure S22.</b> UV-Vis spectrum of dermacozine P (3) in EtOH.....                                                                                                                                                   | 18 |
| <b>Figure S23.</b> IR spectrum of dermacozine P (3) in EtOH.....                                                                                                                                                       | 18 |
| <b>Figure S24.</b> LC-MS analysis of dermacozine P (3) (Orbitrap, Xcalibur) .....                                                                                                                                      | 19 |
| <b>Figure S25.</b> MS/MS analysis of dermacozine P (3) (Orbitrap, Xcalibur).....                                                                                                                                       | 19 |
| <b>Figure S26.</b> $^1\text{H}$ -NMR spectrum of dermacozine P (3) (600 MHz, $\text{DMSO}-d_6$ ).....                                                                                                                  | 20 |
| <b>Figure S27.</b> $^1\text{H}$ - $^{13}\text{C}$ HSQC spectrum of dermacozine P (3) (600 MHz, $\text{DMSO}-d_6$ ).....                                                                                                | 20 |
| <b>Figure S28.</b> $^1\text{H}$ - $^{13}\text{C}$ HMBC spectrum of dermacozine P (3) (600 MHz, $\text{DMSO}-d_6$ ).....                                                                                                | 21 |
| <b>Figure S29.</b> $^1\text{H}$ - $^1\text{H}$ COSY spectrum of dermacozine P (3) (600 MHz, $\text{DMSO}-d_6$ ) .....                                                                                                  | 21 |
| <b>Figure S30.</b> 1D-NOESY spectrum of dermacozine P (3) (600 MHz, $\text{DMSO}-d_6$ ) from irradiation of the signal at 8.03 ppm.....                                                                                | 22 |
| <b>Figure S31.</b> $^{13}\text{C}$ -NMR $\delta$ calculated values of dermacozine A-D (4-7) using the ACD Labs software with Neural Network Algorithm, solvent $\text{DMSO}-d_6$ .....                                 | 22 |
| <b>Figure S32.</b> $^{13}\text{C}$ -NMR $\delta$ calculated values of dermacozine E-H (8-11) using the ACD Labs Software with Neural Network Algorithm, solvent $\text{DMSO}-d_6$ .....                                | 23 |
| <b>Figure S33.</b> $^{13}\text{C}$ -NMR $\delta$ calculated values of dermacozine I-J (12-13) and dermacozine M-P (14, 1-3) using the ACD Labs Software with Neural Network Algorithm, solvent $\text{DMSO}-d_6$ ..... | 23 |
| <b>Figure S34.</b> $^{13}\text{C}$ -NMR $\delta$ calculated values of possible structures (A-F) of dermacozine N (1), using the ACD Labs Software with Neural Network Algorithm, solvent $\text{DMSO}-d_6$ .....       | 24 |
| <b>Figure S35.</b> $^{13}\text{C}$ -NMR $\delta$ calculated values of possible structures (G-L) of dermacozine N (1), using the ACD Labs Software with Neural Network Algorithm, solvent $\text{DMSO}-d_6$ .....       | 24 |
| <b>Figure S36.</b> $^{13}\text{C}$ -NMR $\delta$ calculated values of possible structures (M-R) of dermacozine N (1), using the ACD Labs Software with Neural Network Algorithm, solvent $\text{DMSO}-d_6$ .....       | 25 |
| <b>Figure S37.</b> $^{13}\text{C}$ -NMR $\delta$ calculated values of possible structures (S-U) of dermacozine N (1), using the ACD Labs Software with Neural Network Algorithm, solvent $\text{DMSO}-d_6$ .....       | 25 |
| <b>Figure S38.</b> $^{13}\text{C}$ -NMR $\delta$ calculated values of possible structures (V and W) of dermacozine N (1), using the ACD Labs Software with Neural Network Algorithm, solvent $\text{DMSO}-d_6$ .....   | 26 |
| <b>Table S1.</b> Comparison between calculated vs. experimental $^{13}\text{C}$ -NMR $\delta$ values of dermacozines A-J (4-13) .....                                                                                  | 27 |
| <b>Figure 39.</b> Linear regression graphics between ACD Labs (Neural Network Algorithm) calculated vs. experimental $^{13}\text{C}$ -NMR $\delta$ values of dermacozine A-H (4-11).....                               | 28 |



|                                                                                                                                                                                                                                                                |    |
|----------------------------------------------------------------------------------------------------------------------------------------------------------------------------------------------------------------------------------------------------------------|----|
| <b>Table S2.</b> Comparison between the experimental $^{13}\text{C}$ -NMR $\delta$ values of dermacozine N (1) vs. the calculated ones of possible structures A, D, E, G, H, I, J, K, N, P, Q, V, W by ACD Labs (Neural Network Algorithm, DMSO- $d_6$ ) ..... | 30 |
| <b>Figure S41.</b> Linear regression graphics between $^{13}\text{C}$ -NMR $\delta$ experimental values of dermacozine N (1) vs. the ACD Labs calculated ones (Neural Network Algorithm, DMSO- $d_6$ ) (4-13).....                                             | 31 |
| <b>Figure S42.</b> Linear regression graphics between $^{13}\text{C}$ -NMR $\delta$ experimental values of dermacozine N (1) vs. the ACD Labs (Neural Network Algorithm, DMSO- $d_6$ ) calculated ones for possible structures N, P, Q, V, W .....             | 32 |
| <b>Table S3.</b> Absolute Error and the standard deviation of the error from the mean between the calculated (Structure W) and the experimental dermacozine N (1) $^{13}\text{C}$ -NMR chemical shifts .....                                                   | 33 |
| <b>Table S4.</b> Experimental values of $^{13}\text{C}$ -NMR $\delta$ chemical shifts of dermacozines E (8), F (9), G (9) and O (2) for multiple regression and t-test .....                                                                                   | 34 |
| <b>Figure S43.</b> Multiple regression analysis between the experimental $^{13}\text{C}$ -NMR $\delta$ values of dermacozines E (8), F (9), G (9) as independent variables and those of dermacozine O (2) as dependent variables .....                         | 37 |
| <b>Table S5.</b> Residuals between the observed and predicted values of $^{13}\text{C}$ -NMR $\delta$ of dermacozines E (8), F (9), G (9) as independent variables and those of dermacozine O (2) as dependent variables .....                                 | 38 |
| <b>Table S6.</b> Comparison between experimental and the ACD Labs calculated $^{13}\text{C}$ -NMR $\delta$ chemical shift values of dermacozines P (3) (Neural Network Algorithm, DMSO- $d_6$ )....                                                            | 39 |
| <b>Figure S44.</b> Linear regression graphics between the experimental $^{13}\text{C}$ -NMR $\delta$ chemical shifts of dermacozine P (3) and the ACD Labs calculated $^{13}\text{C}$ -NMR $\delta$ values (Neural Network Algorithm, DMSO- $d_6$ ) .....      | 40 |
| <b>Table S7.</b> Absolute Error and the standard deviation of the error from the mean between the calculated and the experimental dermacozine P (3) $^{13}\text{C}$ -NMR chemical shifts .....                                                                 | 41 |
| <b>Figure S45.</b> Evaluation of the cytotoxic activity of dermacozine N (1) against human A) Melanoma (A2058) and B) Hepatocellular carcinoma (HepG2) cell lines (IC <sub>50</sub> graphs) ..                                                                 | 42 |
| <b>Table S8.</b> Experimental NMR spectroscopic data for dermacozine N (1) with HMBC, COSY and NOESY correlations (800 MHz, DMSO- $d_6$ ) .....                                                                                                                | 43 |
| <b>Table S9.</b> Experimental NMR spectroscopic data for dermacozine O (2) with HMBC and COSY correlations (800 MHz, DMSO- $d_6$ ).....                                                                                                                        | 44 |
| <b>Table S10.</b> Experimental NMR spectroscopic data for dermacozine P (3) with HMBC and COSY correlations (600 MHz, DMSO- $d_6$ ).....                                                                                                                       | 45 |
| <b>Figure S46.</b> Workflow of dermacozine N (1) structure determination .....                                                                                                                                                                                 | 46 |

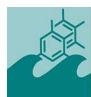

*Bertalan Juhasz et al.*

|                                                                                                                                                                                                                                           |    |
|-------------------------------------------------------------------------------------------------------------------------------------------------------------------------------------------------------------------------------------------|----|
| <b>Figure S47.</b> Workflow of dermacozine O ( <b>2</b> ) structure determination. ....                                                                                                                                                   | 47 |
| <b>Figure S48.</b> Workflow of dermacozine P ( <b>3</b> ) structure determination .....                                                                                                                                                   | 48 |
| <b>Theme S1.</b> Dermacozine N ( <b>1</b> ) H-9 and NH <sub>2</sub> -12 distance (Modelled with Chemdraw, Chem 3D).....                                                                                                                   | 49 |
| <b>Theme S2.</b> TLC plate of the initial FD fraction following Kupchan liquid-liquid partitioning, showing the colorful bands where the dermacozines were isolated from (left) and the same TLC plate under UV 360 nm light (right)..... | 50 |
| <b>Theme S3.</b> HPLC chromatogram for the isolation of dermacozine O ( <b>2</b> ).....                                                                                                                                                   | 50 |
| <b>Theme S4.</b> HPLC chromatogram for the isolation of dermacozine P ( <b>3</b> ) .....                                                                                                                                                  | 51 |

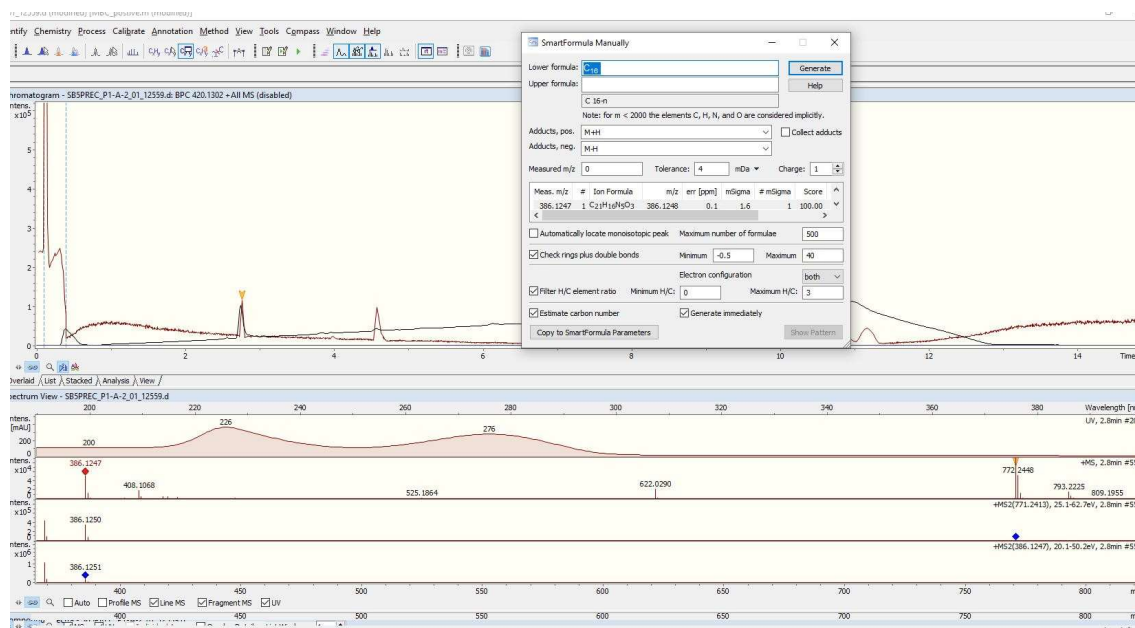

**Figure S1.** LC-MS analysis of dermacozine N (1) (qTOF, Bruker)

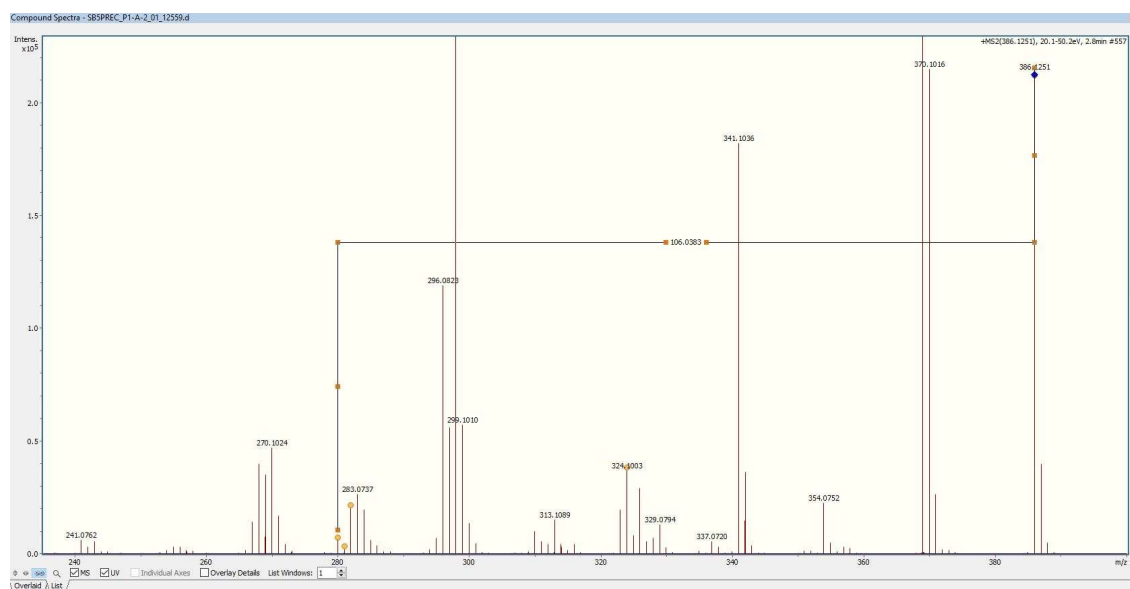

**Figure S2.** MS/MS of dermacozine N (1) (qTOF, Bruker)

Bertalan Juhasz et al.

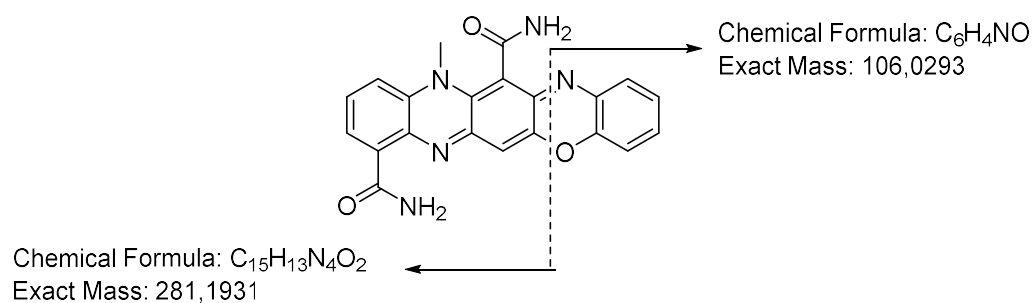

**Figure S3A.** Proposed MS fragmentation pathway of dermacozine N (**1**) showing loss of a (-ON(C<sub>6</sub>H<sub>4</sub>)-) fragment.

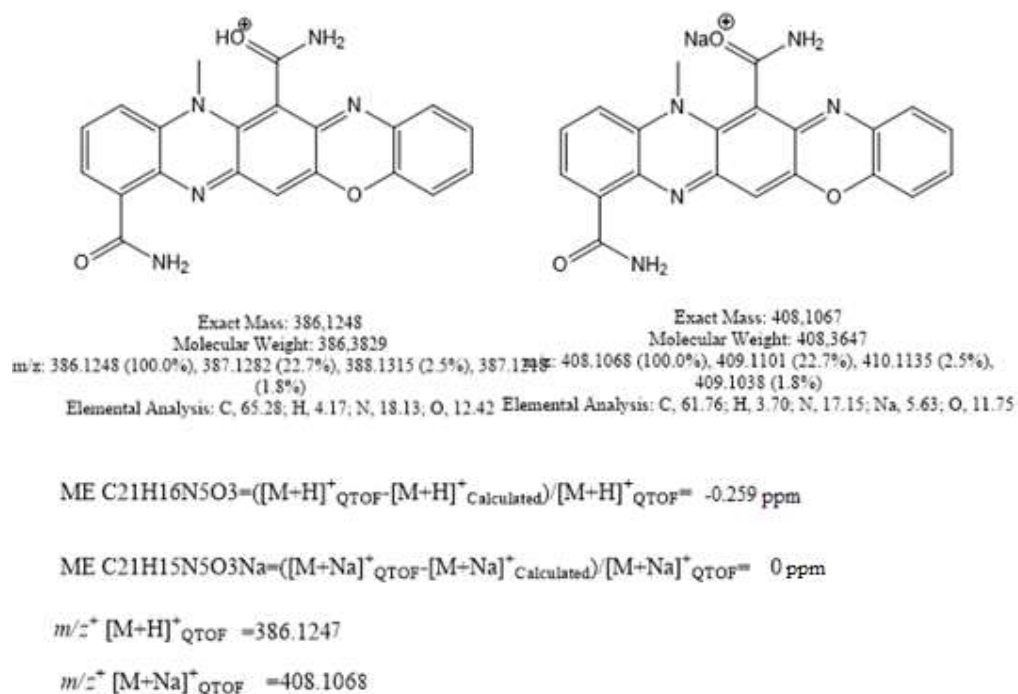

**Figure S3B.** Mass Error between the calculated (Chemdraw modelled) and experimental (qTOF) m/z ratio of dermacozine N (**1**)

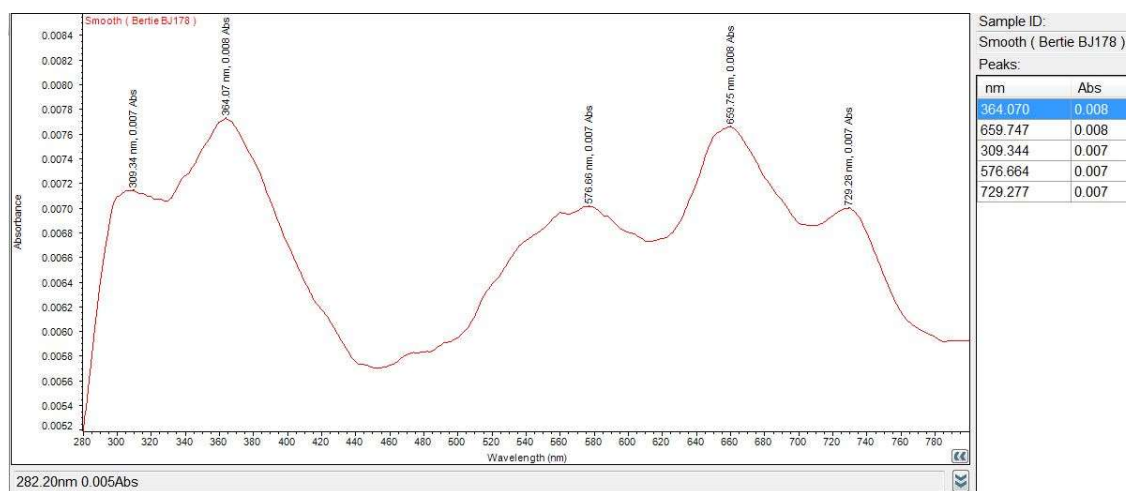

**Figure S4.** UV-Vis spectrum of dermazonine N (1) in EtOH

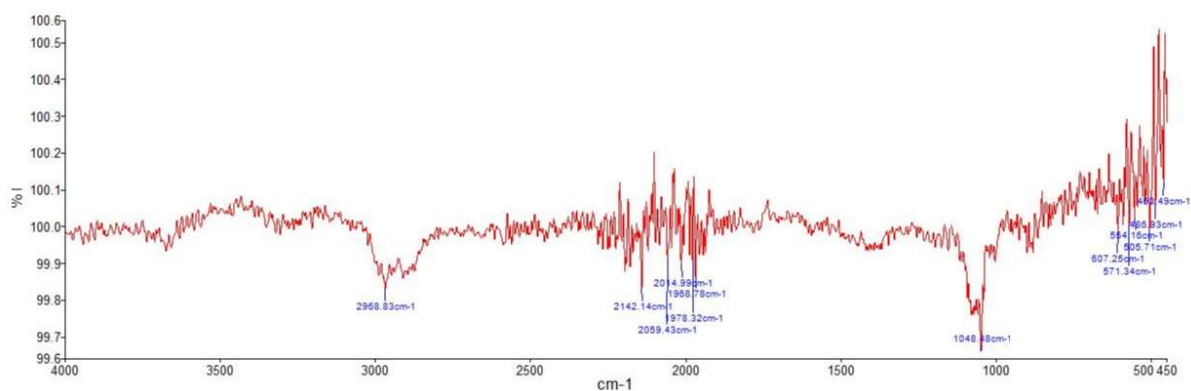

**Figure S5.** IR spectrum of dermazonine N (1) in EtOH



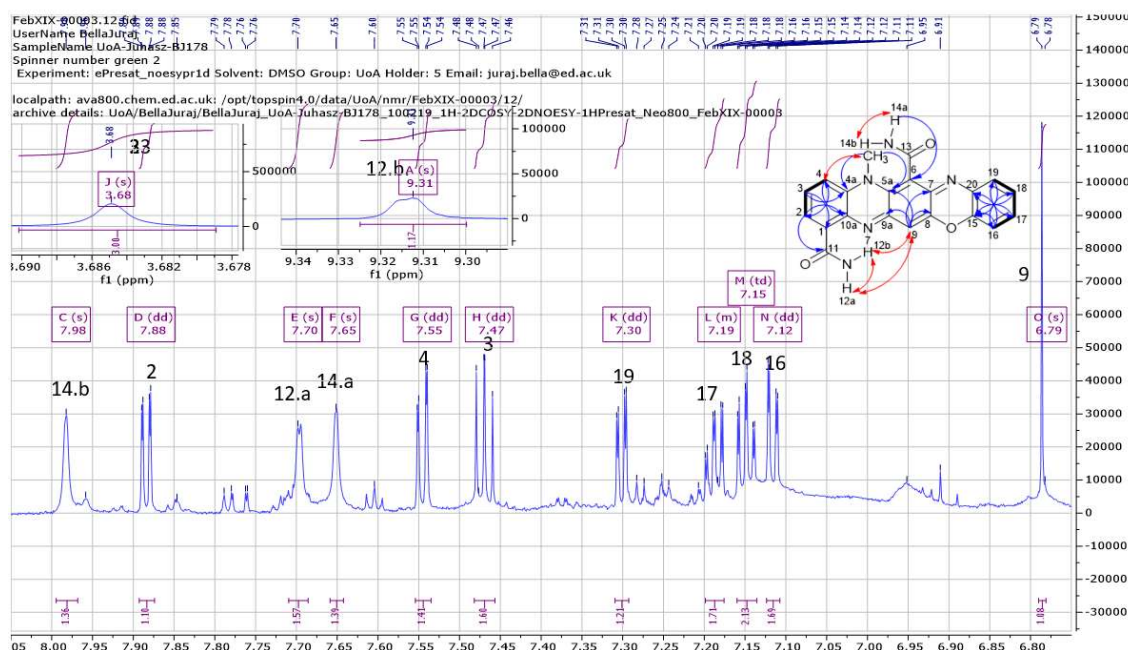

**Figure S6.** Dermacozine N (1)  $^1\text{H}$ -NMR spectrum (800 MHz,  $\text{DMSO}-d_6$ )

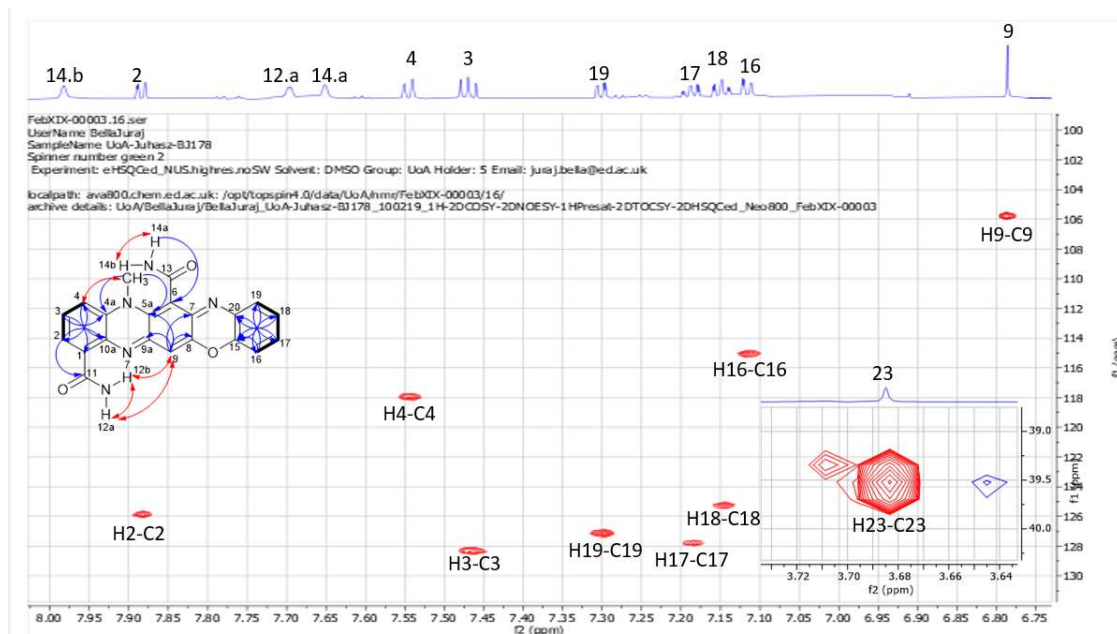

**Figure S7.**  $^1\text{H}$ - $^{13}\text{C}$  HSQC spectrum of dermacozine N (1) (800 MHz,  $\text{DMSO}-d_6$ )  
(Inlet shows the N-methyl group)

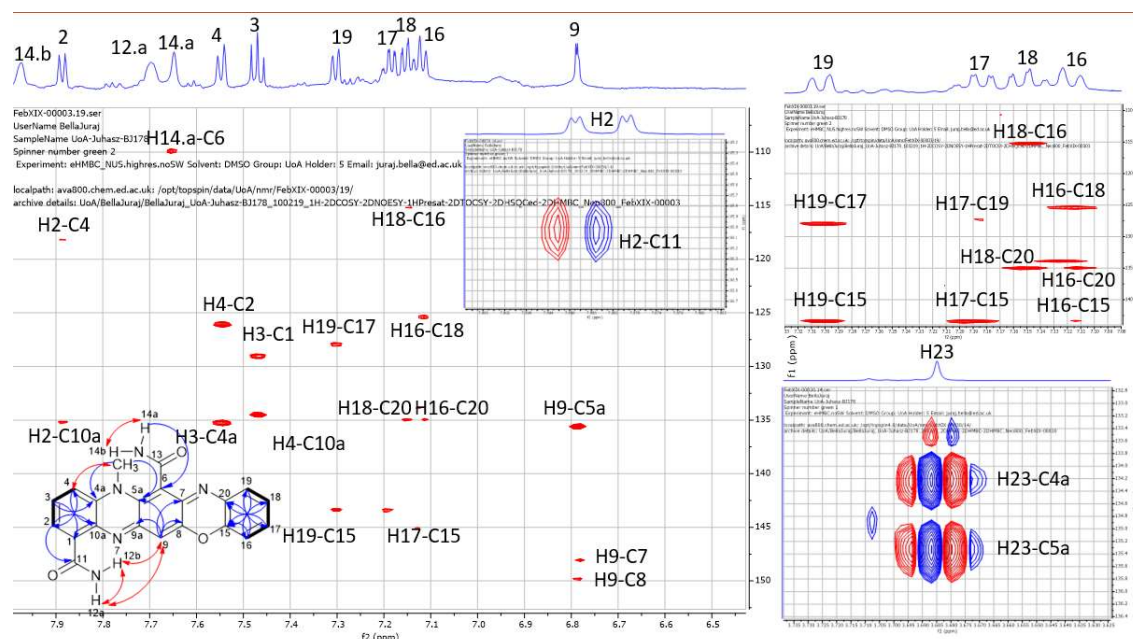

**Figure S8.**  $^1\text{H}$ - $^{13}\text{C}$  HMBC (magnitude mode) spectrum of dermacozine N (1) (800 MHz, DMSO- $d_6$ ) Inlets show the H-2 to C-11 carbonyl correlation (top left, phase sensitive mode), the *ortho*-substituted D-ring (top right, magnitude mode) and N-methyl C4a, C5a correlation (bottom right, phase sensitive mode)

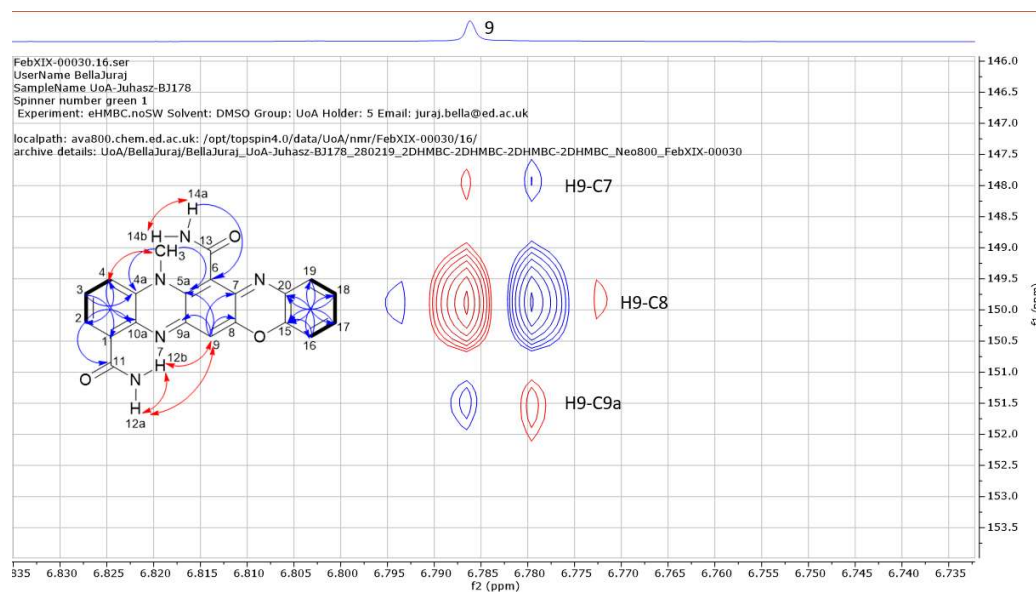

**Figure S9.**  $^1\text{H}$ - $^{13}\text{C}$  HMBC spectrum of dermacozine N (1) with 2 Hz Coupling (800 MHz, DMSO- $d_6$ )

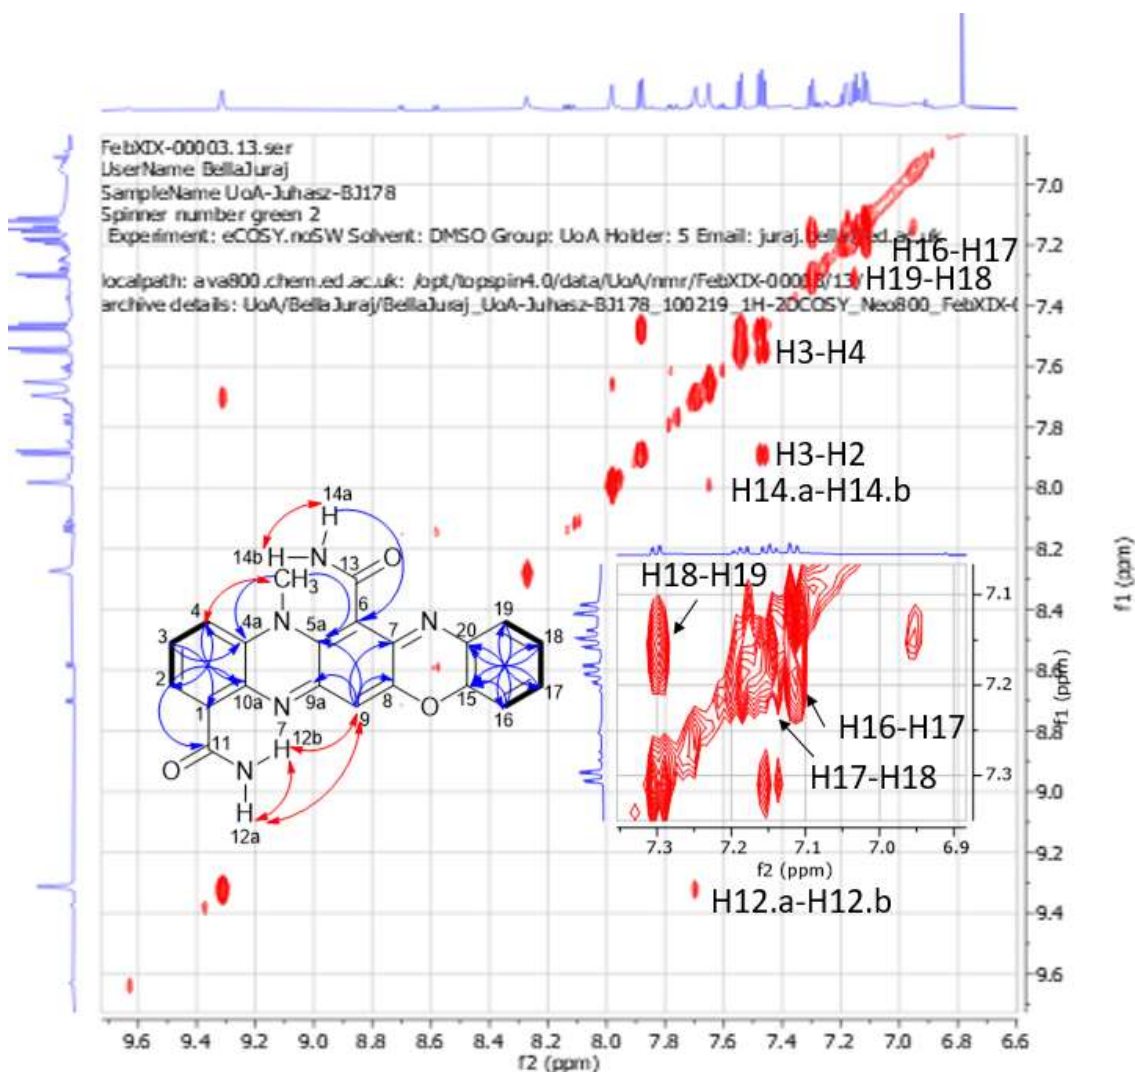

**Figure S10.**  $^1\text{H}$ - $^1\text{H}$  COSY spectrum of dermacozine N (1) (800 MHz,  $\text{DMSO-}d_6$ )

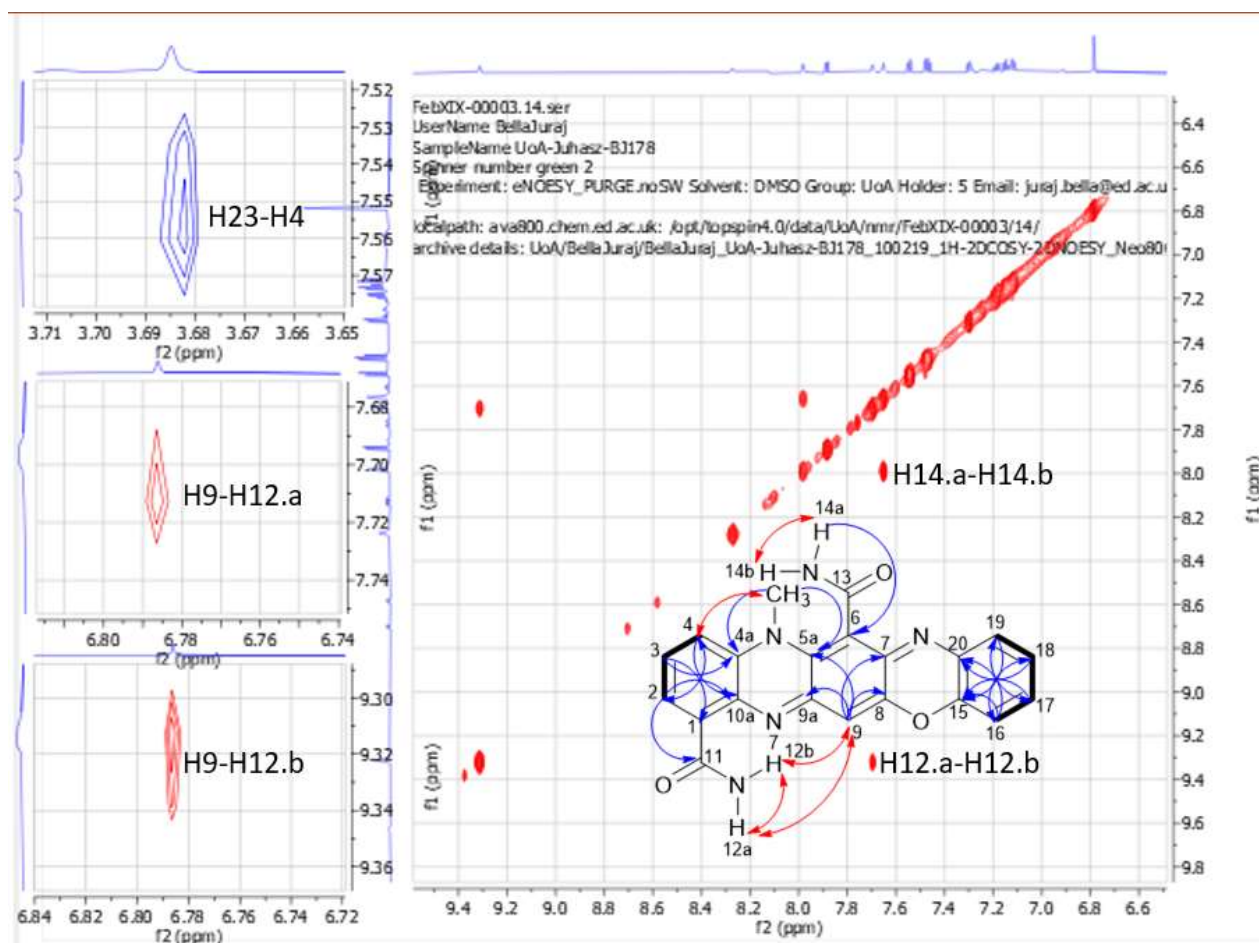

**Figure S11.**  $^1\text{H}$ - $^1\text{H}$  NOESY spectrum of dermacozine N (1) (800 MHz,  $\text{DMSO}-d_6$ )  
(Inlets show the N-methyl and H-4 (top), and NH<sub>2</sub>-12 to H-9 (middle and lower) correlations)



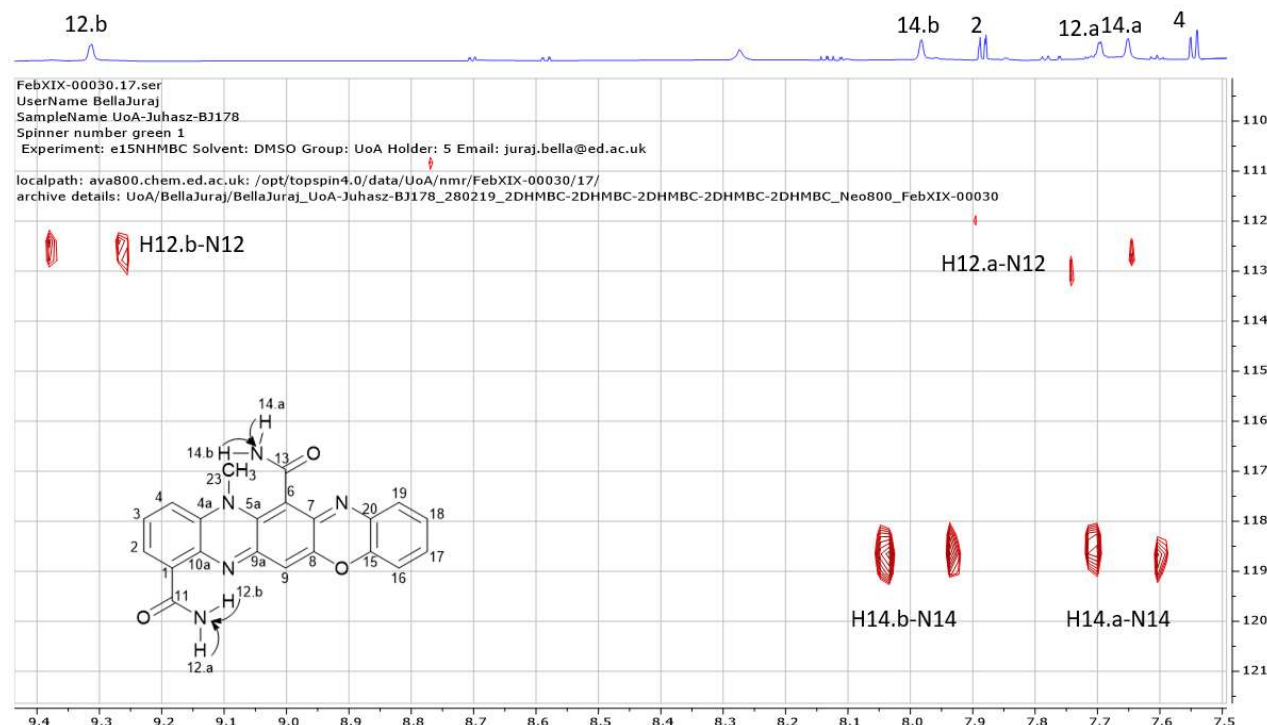

**Figure S12.**  $^1\text{H}$ - $^{15}\text{N}$  HMBC spectrum of dermacozine N (1) (800 MHz,  $\text{DMSO}-d_6$ )

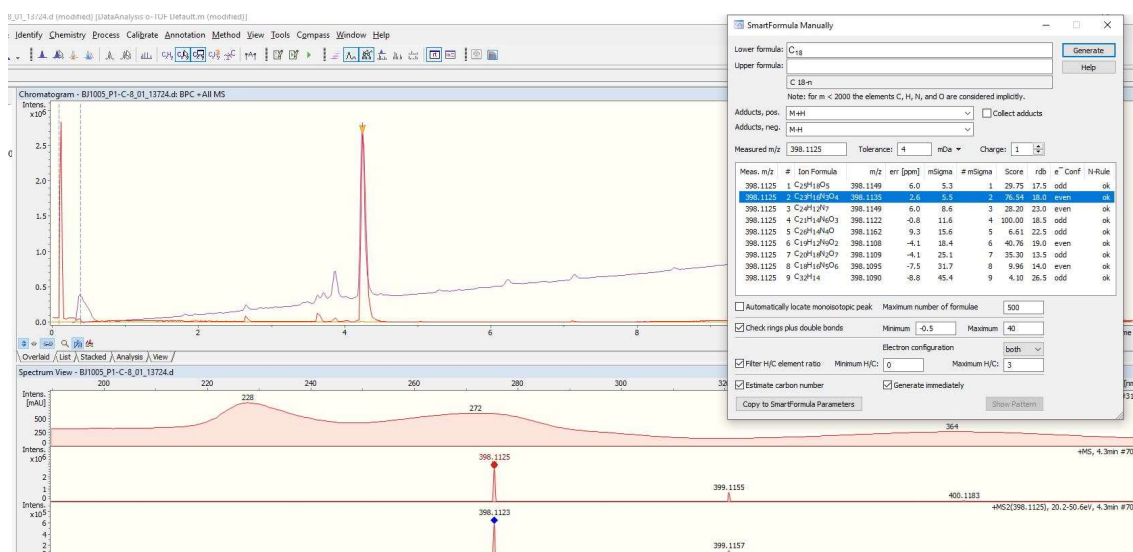

**Figure S13.** LC-MS analysis of dermacozine O (2) (qTOF, Bruker)

Bertalan Juhasz et al.

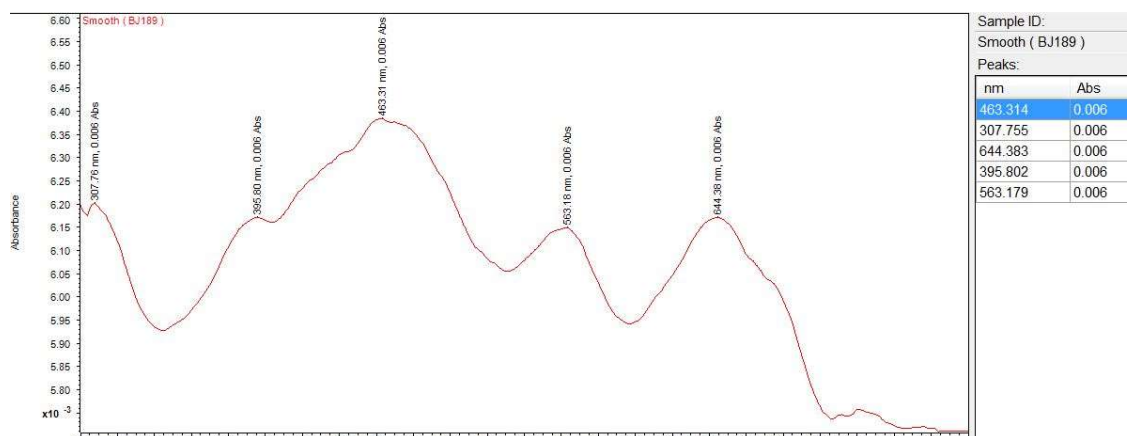

Figure S14. UV-Vis spectrum of dermacozine O (2) in EtOH

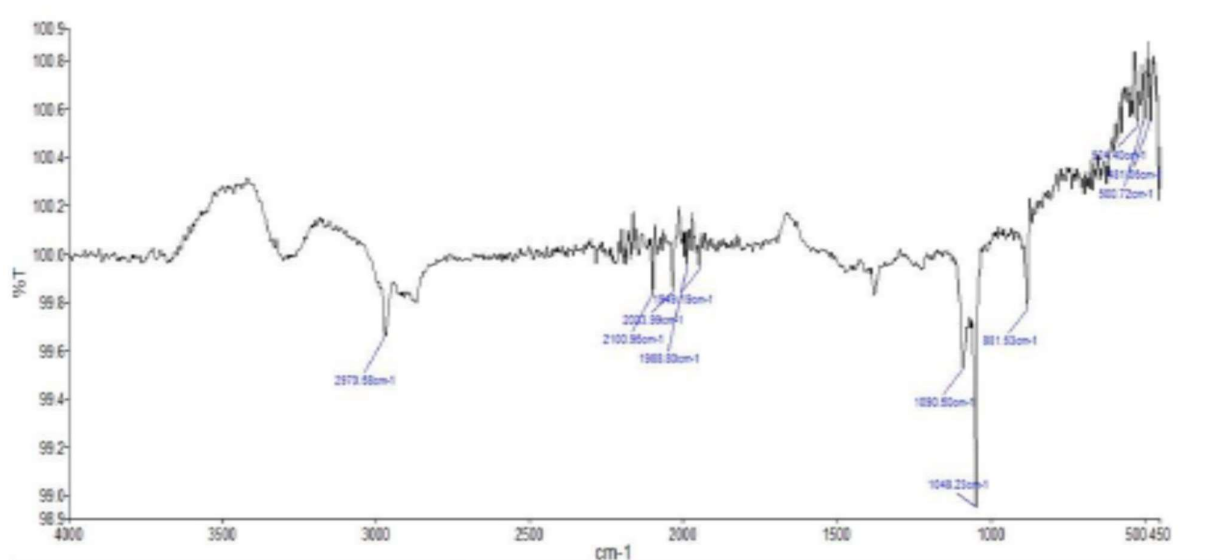

Figure S15. IR spectrum of dermacozine O (2) in EtOH

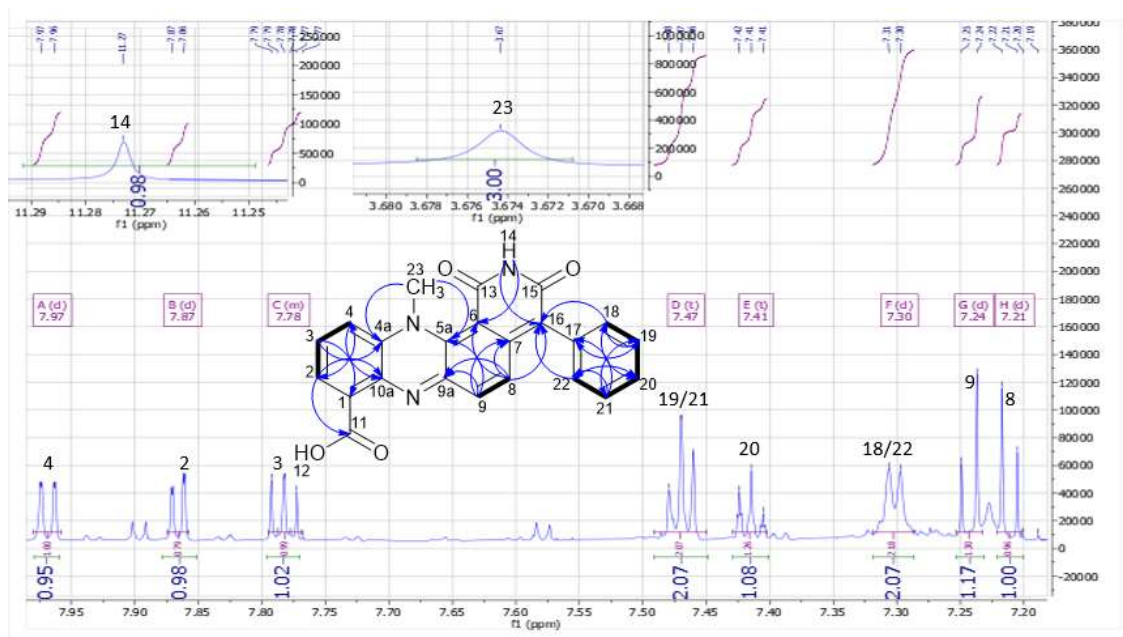

**Figure S16.**  $^1\text{H}$ -NMR spectrum of dermacozine O (2) (800 MHz,  $\text{DMSO}-d_6$ )

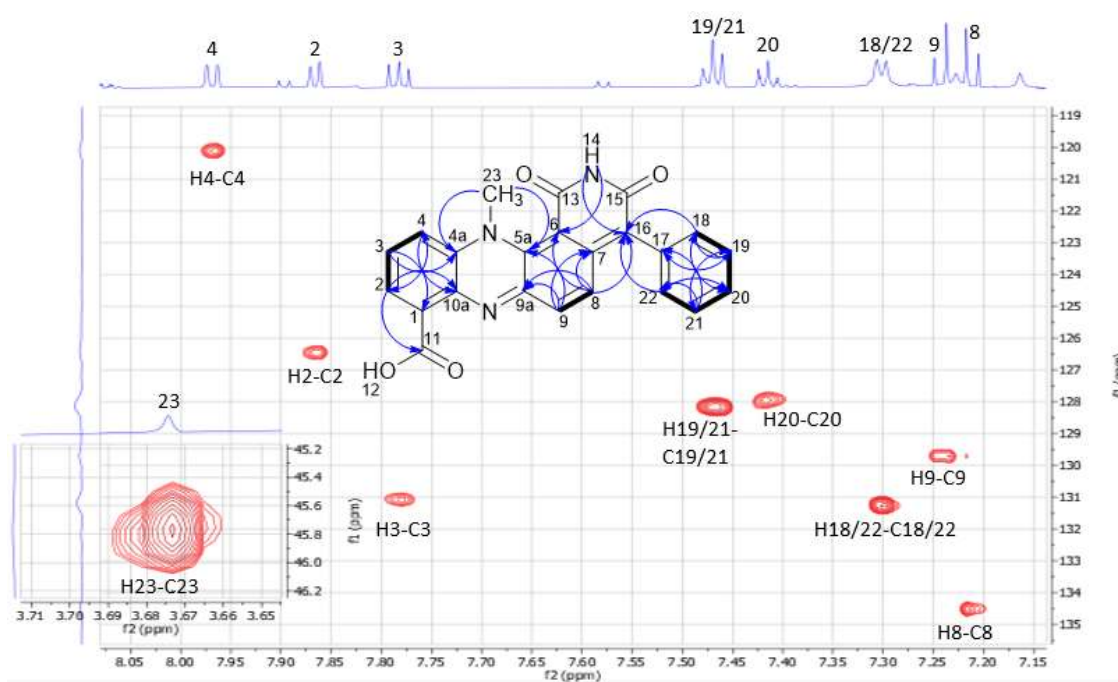

**Figure S17.**  $^1\text{H}$ - $^{13}\text{C}$  HSQC spectrum of dermacozine O (2) (800 MHz,  $\text{DMSO}-d_6$ )

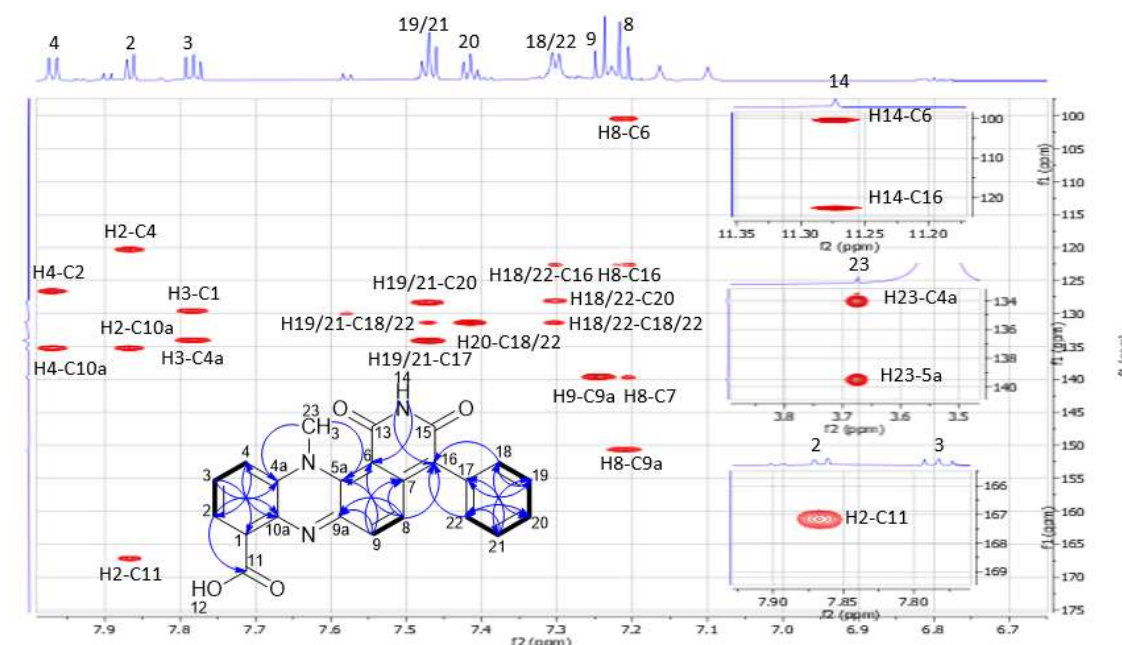

**Figure S18.**  $^1\text{H}$ - $^{13}\text{C}$  HMBC spectrum of dermacozine O (**2**) (800 MHz,  $\text{DMSO}-d_6$ ) (Inlets show NH-14 and C-6, C-16 correlations (top), N-methyl hydrogen atom to C4a and C5a correlations (middle), H2 to C-11 carbonyl correlation (bottom))

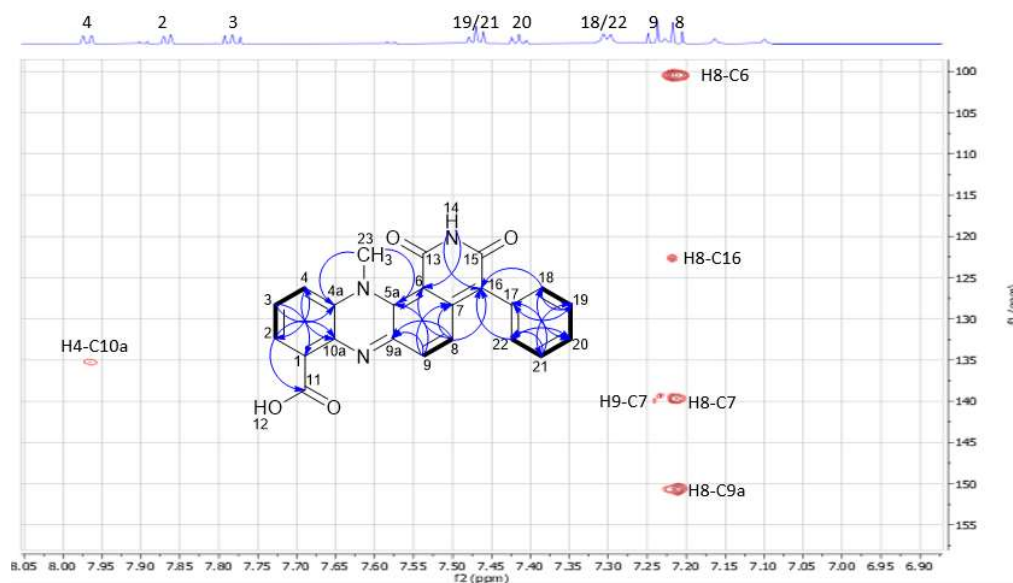

**Figure S19.** Long Range  $^1\text{H}$ - $^{13}\text{C}$  HMBC correlations of Dermacozine O (**2**) with  $J = 2\text{Hz}$  (800 MHz,  $\text{DMSO}-d_6$ )



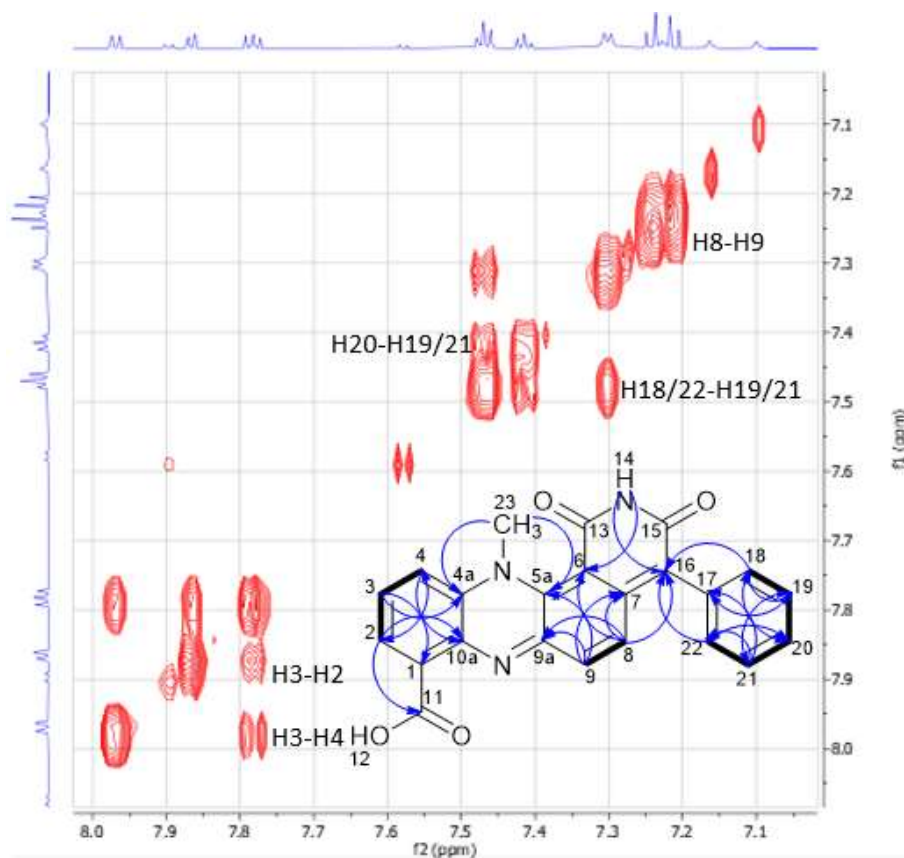

**Figure S20.**  $^1\text{H}$ - $^1\text{H}$  COSY spectrum of dermacozine O (**2**) (800 MHz,  $\text{DMSO}-d_6$ )

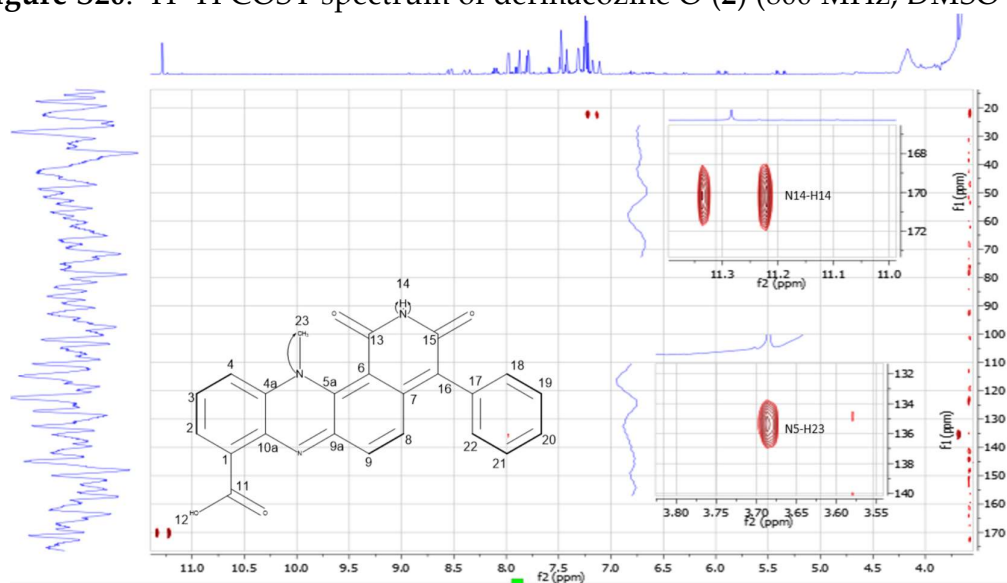

**Figure S21.**  $^1\text{H}$ - $^{15}\text{N}$  HMBC spectrum of dermacozine O (**2**) (800 MHz,  $\text{DMSO}-d_6$ )  
Inlets show the N-methyl nitrogen (top) and the cyclic carboximide nitrogen (bottom)

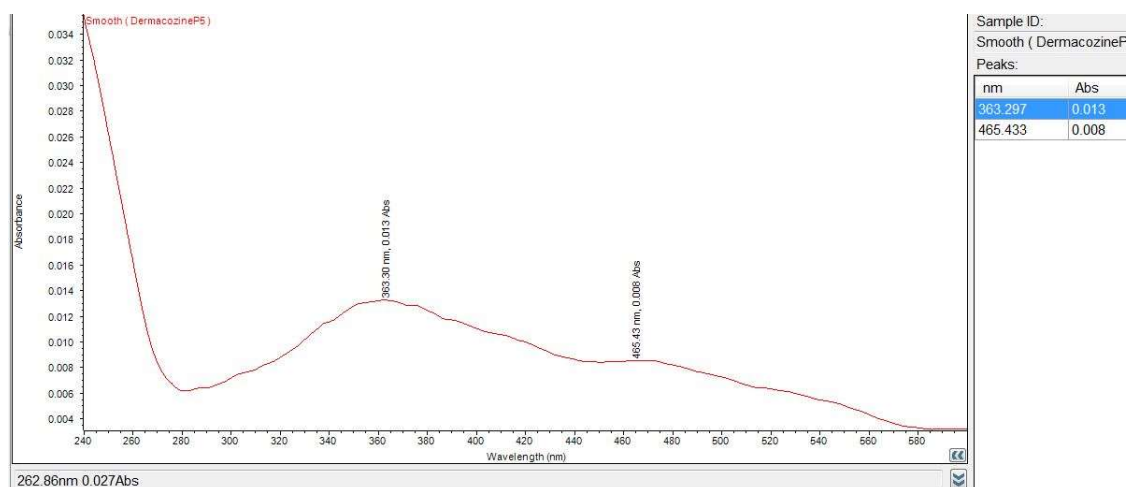

**Figure S22.** UV-Vis spectrum of dermacozine P (3) in EtOH

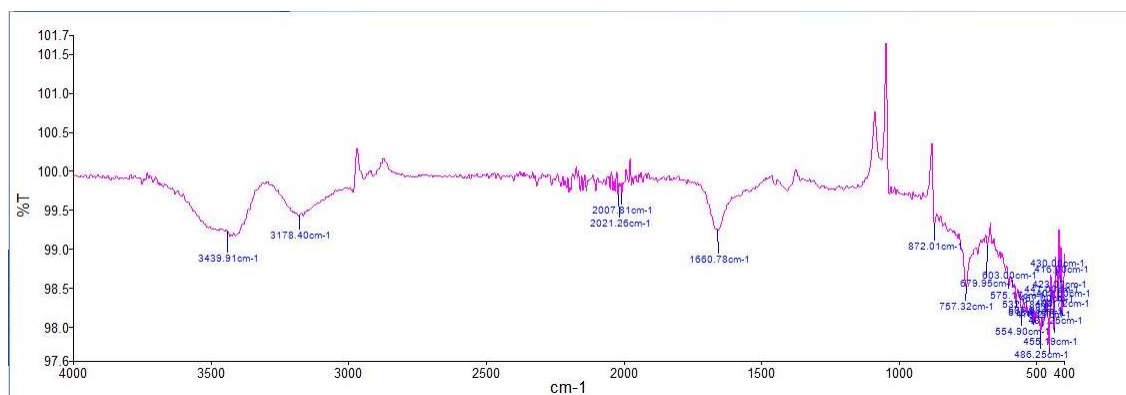

**Figure S23.** IR spectrum of dermacozine P (3) in EtOH

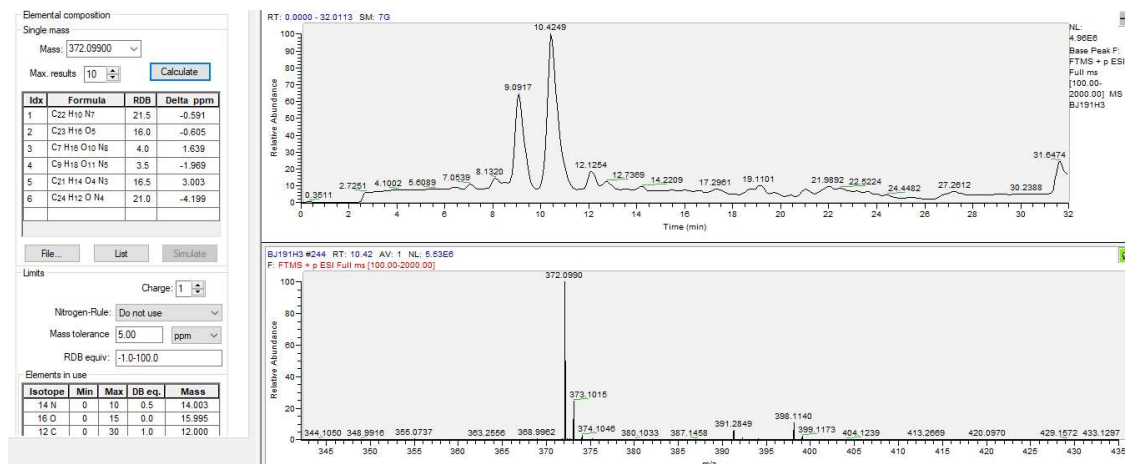

**Figure S24.** LC-MS analysis of dermacozine P (3) (Orbitrap, Xcalibur)

BJ191H3 #239-426 RT: 10.29-17.50 AV: 3 NL: 1.53E5  
T: Average spectrum MS2 372.10 (239-426)

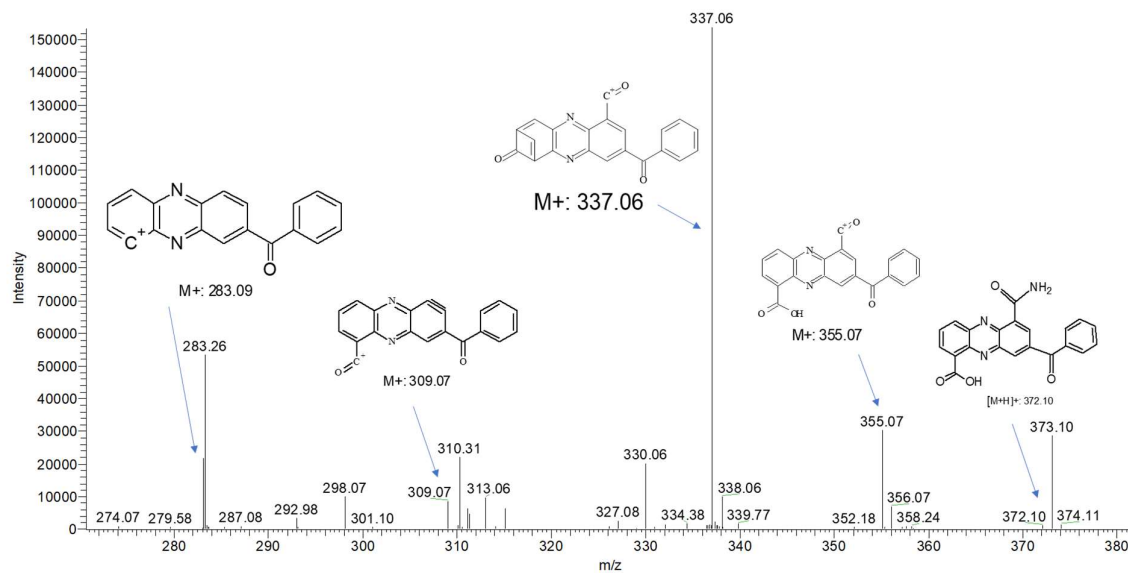

**Figure S25.** MS/MS analysis of dermacozine P (3) (Orbitrap, Xcalibur)

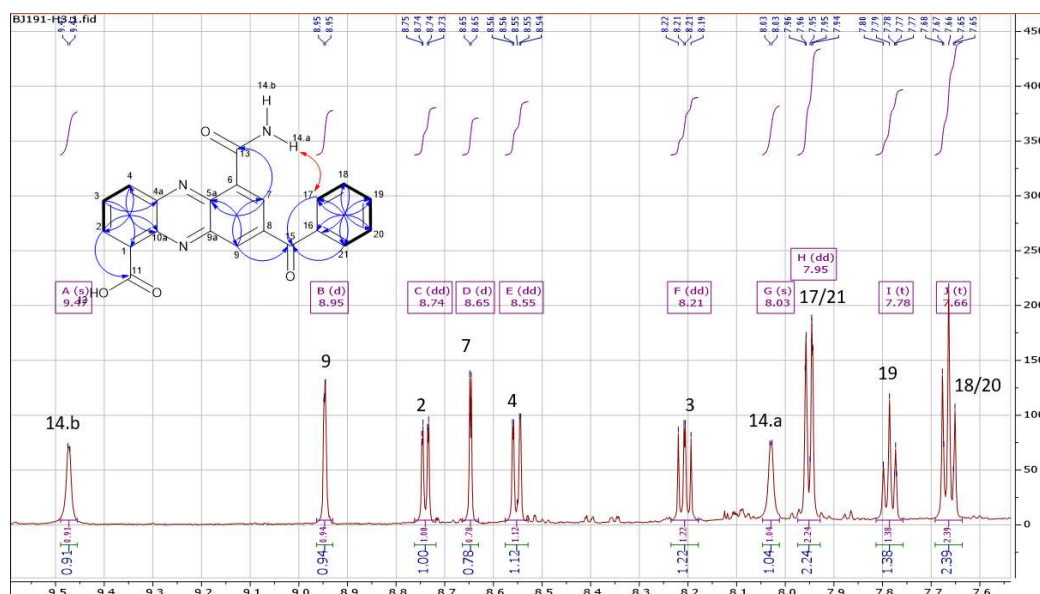

**Figure S26.**  $^1\text{H}$ -NMR spectrum of dermazonine P (3) (600 MHz,  $\text{DMSO}-d_6$ )

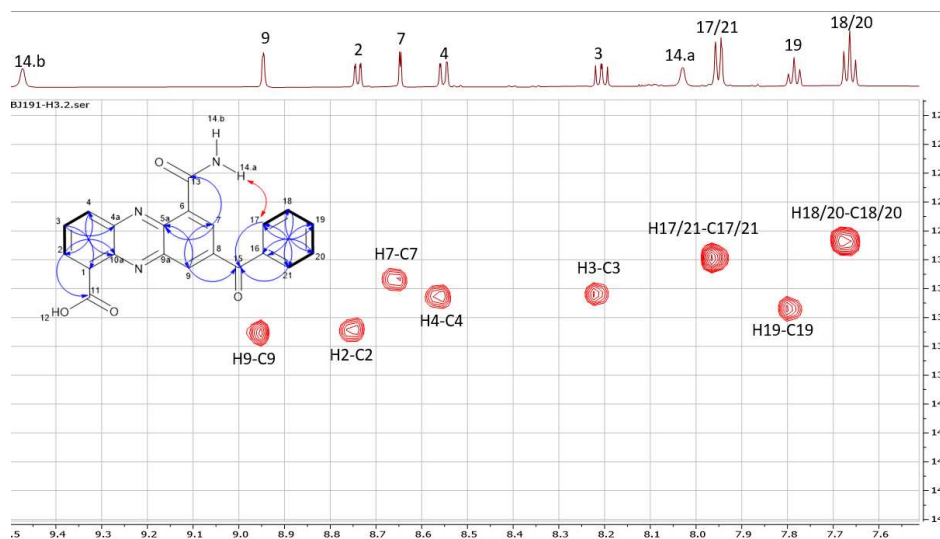

**Figure S27.**  $^1\text{H}$ - $^{13}\text{C}$  HSQC spectrum of dermazonine P (3) (600 MHz,  $\text{DMSO}-d_6$ )

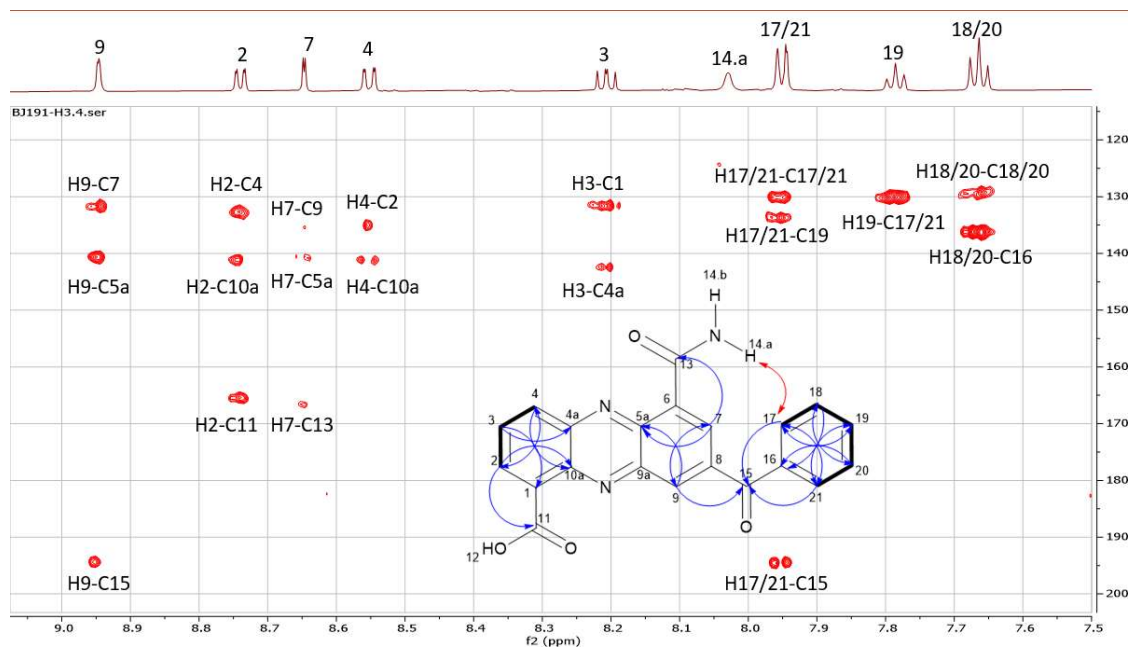

**Figure S28.**  $^1\text{H}$ - $^{13}\text{C}$  HMBC spectrum of dermacozine P (3) (600 MHz,  $\text{DMSO}-d_6$ )

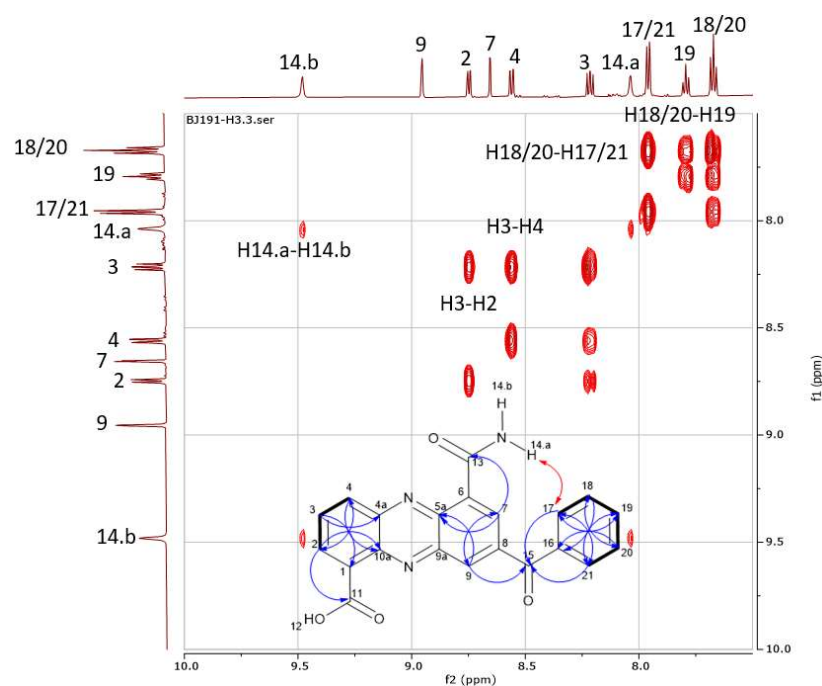

**Figure S29.**  $^1\text{H}$ - $^1\text{H}$  COSY spectrum of dermacozine P (3) (600 MHz,  $\text{DMSO}-d_6$ )

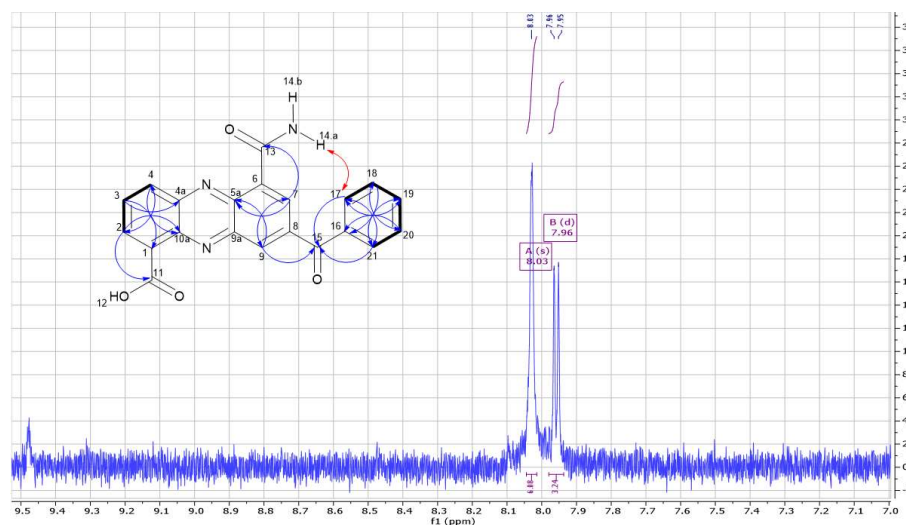

**Figure S30.** 1D-NOESY spectrum of dermacozine P (**3**) (600 MHz, DMSO- $d_6$ ) from irradiation of the signal at 8.03 ppm.

Demarcozine A-D  $\delta_C$  shifts modelled with ACD Labs Neural Network Algorithm

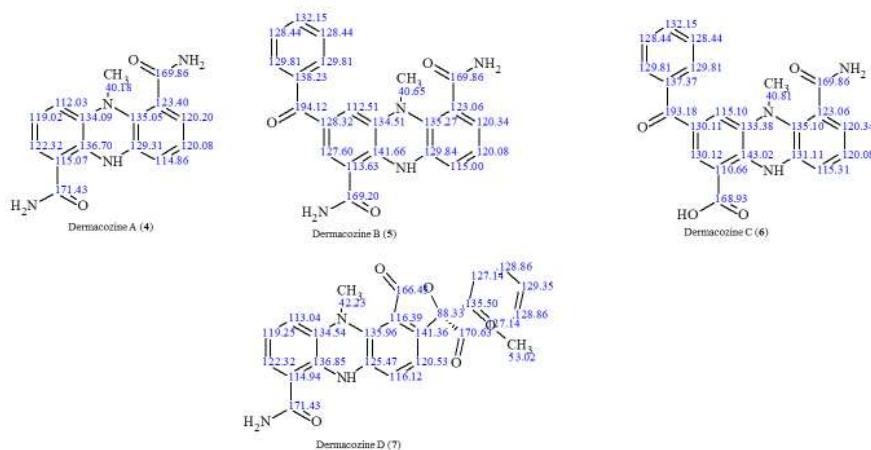

**Figure S31.**  $^{13}\text{C}$ -NMR  $\delta$  calculated values of dermacozine A-D (**4-7**) using the ACD Labs software with Neural Network Algorithm, solvent DMSO- $d_6$



Demarcozine E-H  $\delta_C$  shifts modelled with ACD Labs Neural Network Algorithm

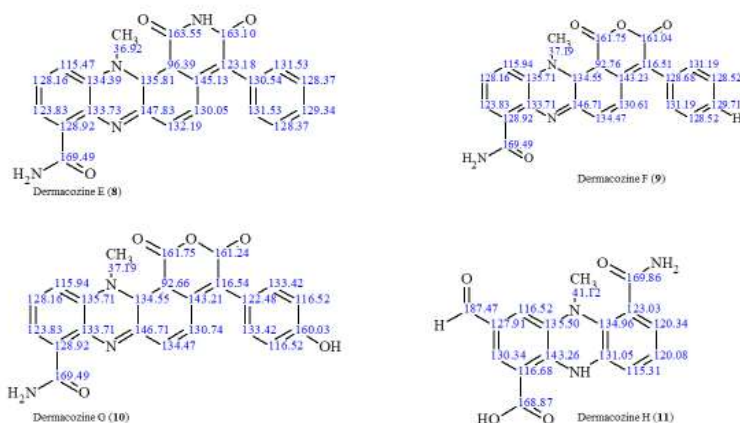

**Figure S32.**  $^{13}\text{C}$ -NMR  $\delta$  calculated values of dermacozine E-H (8-11) using the ACD Labs Software with Neural Network Algorithm, solvent  $\text{DMSO}-d_6$

Demarcozine I-J and dermacozine M-P  $\delta_C$  shifts modelled with ACD Labs Neural Network Algorithm

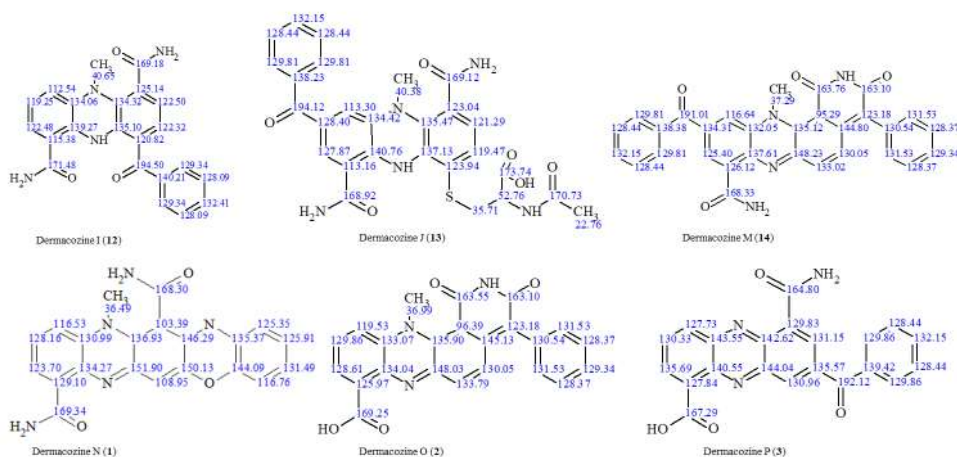

**Figure S33.**  $^{13}\text{C}$ -NMR  $\delta$  calculated values of dermacozine I-J (12-13) and dermacozine M-P (14, 1-3) using the ACD Labs Software with Neural Network Algorithm, solvent  $\text{DMSO}-d_6$

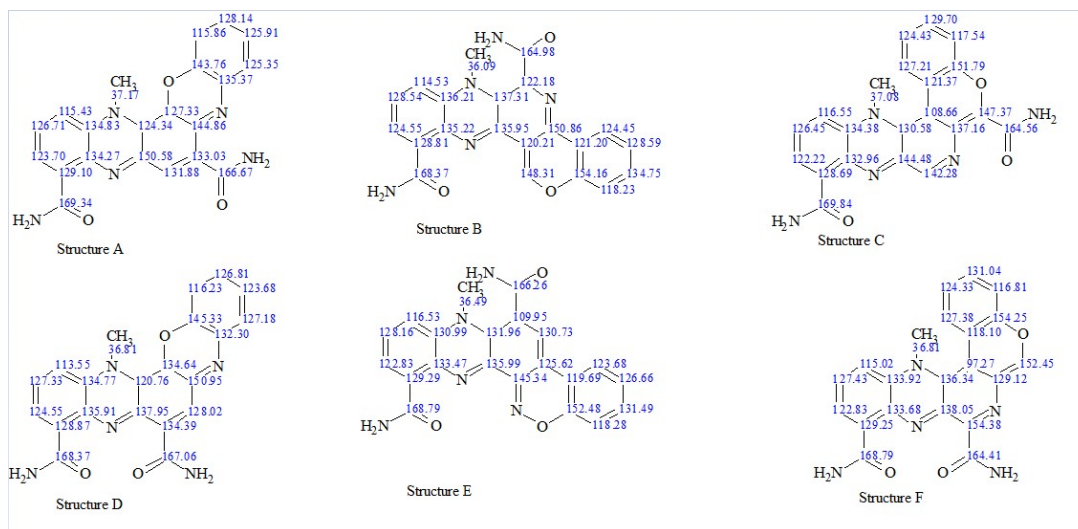

**Figure S34.**  $^{13}\text{C}$ -NMR  $\delta$  calculated values of possible structures (A-F) of dermacozine N (1), using the ACD Labs Software with Neural Network Algorithm, solvent DMSO- $d_6$

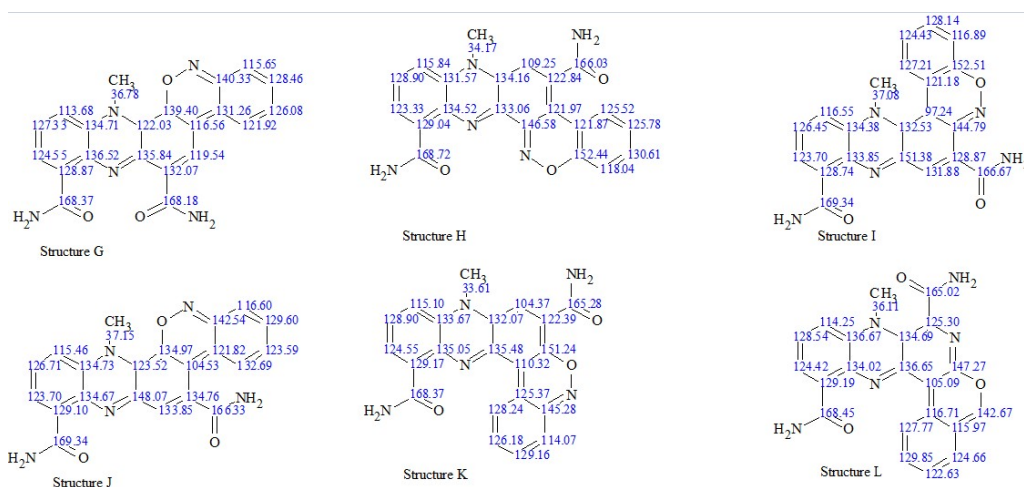

**Figure S35.**  $^{13}\text{C}$ -NMR  $\delta$  calculated values of possible structures (G-L) of dermacozine N (1), using the ACD Labs Software with Neural Network Algorithm, solvent DMSO- $d_6$



Bertalan Juhasz et al.

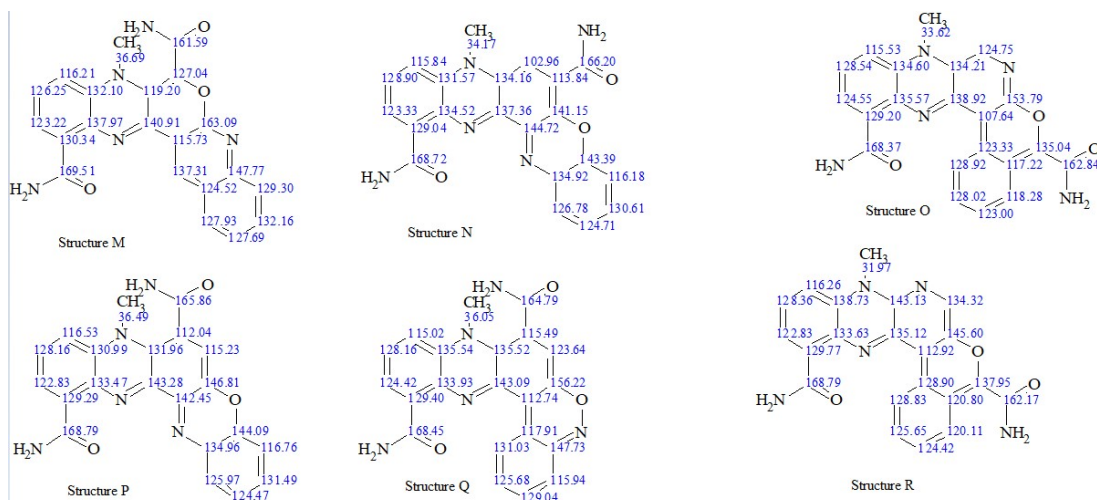

**Figure S36.**  $^{13}\text{C}$ -NMR  $\delta$  calculated values of possible structures (M-R) of dermacozine N (1), using the ACD Labs Software with Neural Network Algorithm, solvent  $\text{DMSO}-d_6$

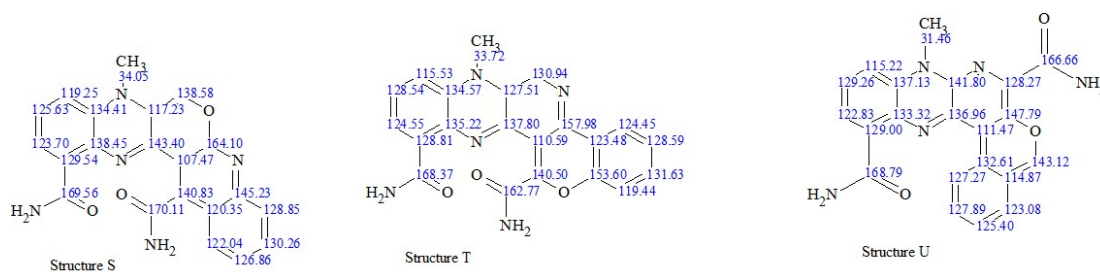

**Figure S37.**  $^{13}\text{C}$ -NMR  $\delta$  calculated values of possible structures (S-U) of dermacozine N (1), using the ACD Labs Software with Neural Network Algorithm, solvent  $\text{DMSO}-d_6$

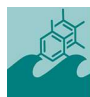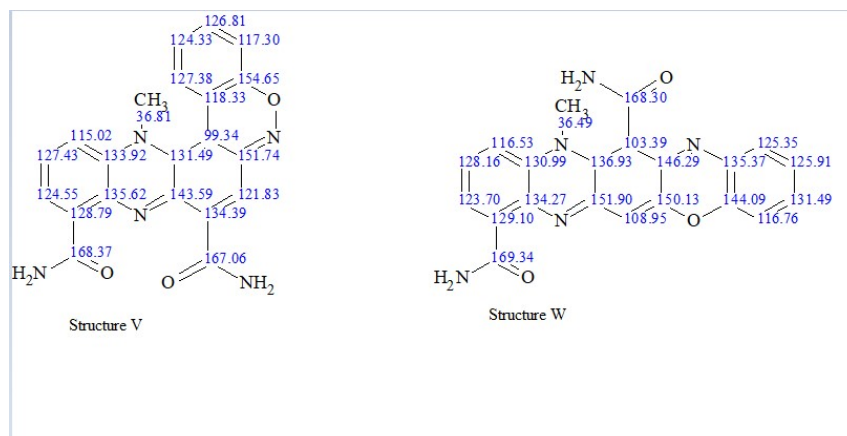

**Figure S38.**  $^{13}\text{C}$ -NMR  $\delta$  calculated values of possible structures (V and W) of dermacozine N (1), using the ACD Labs Software with Neural Network Algorithm, solvent  $\text{DMSO}-d_6$

| Dermacozine Atom Number | Experimental $\delta^{13}\text{C}$ Dermacozine A | Calculated $\delta^{13}\text{C}$ Dermacozine A | Experimental $\delta^{13}\text{C}$ Dermacozine B | Calculated $\delta^{13}\text{C}$ Dermacozine B | Experimental $\delta^{13}\text{C}$ Dermacozine C | Calculated $\delta^{13}\text{C}$ Dermacozine C | Experimental $\delta^{13}\text{C}$ Dermacozine D | Calculated $\delta^{13}\text{C}$ Dermacozine D | Experimental $\delta^{13}\text{C}$ Dermacozine E | Calculated $\delta^{13}\text{C}$ Dermacozine E | Experimental $\delta^{13}\text{C}$ Dermacozine F | Calculated $\delta^{13}\text{C}$ Dermacozine F | Experimental $\delta^{13}\text{C}$ Dermacozine G | Calculated $\delta^{13}\text{C}$ Dermacozine G | Experimental $\delta^{13}\text{C}$ Dermacozine H | Calculated $\delta^{13}\text{C}$ Dermacozine H | Experimental $\delta^{13}\text{C}$ Dermacozine I | Calculated $\delta^{13}\text{C}$ Dermacozine I | Experimental $\delta^{13}\text{C}$ Dermacozine J | Calculated $\delta^{13}\text{C}$ Dermacozine J |
|-------------------------|--------------------------------------------------|------------------------------------------------|--------------------------------------------------|------------------------------------------------|--------------------------------------------------|------------------------------------------------|--------------------------------------------------|------------------------------------------------|--------------------------------------------------|------------------------------------------------|--------------------------------------------------|------------------------------------------------|--------------------------------------------------|------------------------------------------------|--------------------------------------------------|------------------------------------------------|--------------------------------------------------|------------------------------------------------|--------------------------------------------------|------------------------------------------------|
| 1                       | 1123                                             | 1151                                           | 1112                                             | 1136                                           | 1074                                             | 1107                                           | 1109                                             | 1149                                           | 1347                                             | 1289                                           | 1319                                             | 1289                                           | 1318                                             | 1289                                           | 1176                                             | 1167                                           | 1148                                             | 1154                                           | 1110                                             | 1132                                           |
| 2                       | 1212                                             | 1223                                           | 1266                                             | 1276                                           | 1292                                             | 1311                                           | 1283                                             | 1223                                           | 1271                                             | 1238                                           | 1272                                             | 1238                                           | 1273                                             | 1238                                           | 1328                                             | 1303                                           | 1213                                             | 1225                                           | 1258                                             | 1279                                           |
| 3                       | 1198                                             | 1190                                           | 1284                                             | 1283                                           | 1279                                             | 1311                                           | 1282                                             | 1193                                           | 1307                                             | 1282                                           | 1309                                             | 1282                                           | 1309                                             | 1282                                           | 1273                                             | 1279                                           | 1211                                             | 1193                                           | 1282                                             | 1284                                           |
| 4                       | 1160                                             | 1120                                           | 1147                                             | 1125                                           | 1143                                             | 1151                                           | 1174                                             | 1130                                           | 1196                                             | 1155                                           | 1195                                             | 1159                                           | 1197                                             | 1159                                           | 1085                                             | 1165                                           | 1158                                             | 1125                                           | 1143                                             | 1132                                           |
| 4a                      | 1388                                             | 1341                                           | 1389                                             | 1345                                           | 1388                                             | 1334                                           | 1387                                             | 1345                                           | 1337                                             | 1344                                           | 1338                                             | 1337                                           | 1336                                             | 1337                                           | 1319                                             | 1355                                           | 1385                                             | 1341                                           | 1381                                             | 1344                                           |
| 5a                      | 1338                                             | 1351                                           | 1335                                             | 1353                                           | 1333                                             | 1351                                           | 1374                                             | 1360                                           | 1390                                             | 1358                                           | 1419                                             | 1346                                           | 1417                                             | 1346                                           | 1330                                             | 1350                                           | 1348                                             | 1343                                           | 1334                                             | 1355                                           |
| 6                       | 1245                                             | 1234                                           | 1247                                             | 1231                                           | 1246                                             | 1231                                           | 1099                                             | 1144                                           | 99.8                                             | 95.4                                           | 95.2                                             | 92.8                                           | 95.4                                             | 927                                            | 1238                                             | 1230                                           | 1254                                             | 1251                                           | 1235                                             | 1230                                           |
| 7                       | 1225                                             | 1202                                           | 1239                                             | 1203                                           | 1243                                             | 1203                                           | 1403                                             | 1414                                           | 1386                                             | 1451                                           | 1427                                             | 1482                                           | 1425                                             | 1482                                           | 1223                                             | 1203                                           | 1201                                             | 1225                                           | 1226                                             | 1213                                           |
| 8                       | 1216                                             | 1201                                           | 1219                                             | 1201                                           | 1216                                             | 1201                                           | 1173                                             | 1205                                           | 1328                                             | 1301                                           | 1340                                             | 1306                                           | 1327                                             | 1307                                           | 1209                                             | 1201                                           | 1242                                             | 1223                                           | 1266                                             | 1195                                           |
| 9                       | 1137                                             | 1149                                           | 1148                                             | 1150                                           | 1153                                             | 1153                                           | 1172                                             | 1161                                           | 1302                                             | 1322                                           | 1304                                             | 1345                                           | 1289                                             | 1345                                           | 1332                                             | 1353                                           | 1169                                             | 1208                                           | 1178                                             | 1239                                           |
| 9a                      | 1380                                             | 1293                                           | 1358                                             | 1298                                           | 1245                                             | 1311                                           | 1386                                             | 1255                                           | 1502                                             | 1478                                           | 1504                                             | 1467                                           | 1503                                             | 1467                                           | 1560                                             | 1511                                           | 1419                                             | 1511                                           | 1568                                             | 1571                                           |
| 10a                     | 1406                                             | 1367                                           | 1446                                             | 1427                                           | 1457                                             | 1460                                           | 1409                                             | 1369                                           | 1352                                             | 1327                                           | 1354                                             | 1337                                           | 1354                                             | 1337                                           | 1457                                             | 1433                                           | 1365                                             | 1393                                           | 1422                                             | 1408                                           |
| 11                      | 1711                                             | 1714                                           | 1707                                             | 1692                                           | 1691                                             | 1689                                           | 1710                                             | 1714                                           | 1662                                             | 1685                                           | 1664                                             | 1695                                           | 1663                                             | 1695                                           | 1687                                             | 1688                                           | 1697                                             | 1715                                           | 1699                                             | 1689                                           |
| Methoxy                 | 40.1                                             | 40.2                                           | 40.0                                             | 40.7                                           | 40.0                                             | 40.8                                           | 42.5                                             | 42.2                                           | 45.9                                             | 36.9                                           | 46.0                                             | 37.2                                           | 46.3                                             | 37.2                                           | 39.3                                             | 41.1                                           | 40.0                                             | 40.7                                           | 39.7                                             | 40.4                                           |

**Table S1.** Comparison between calculated vs. experimental  $^{13}\text{C}$ -NMR  $\delta$  values of dermacozines A-J (4-13)

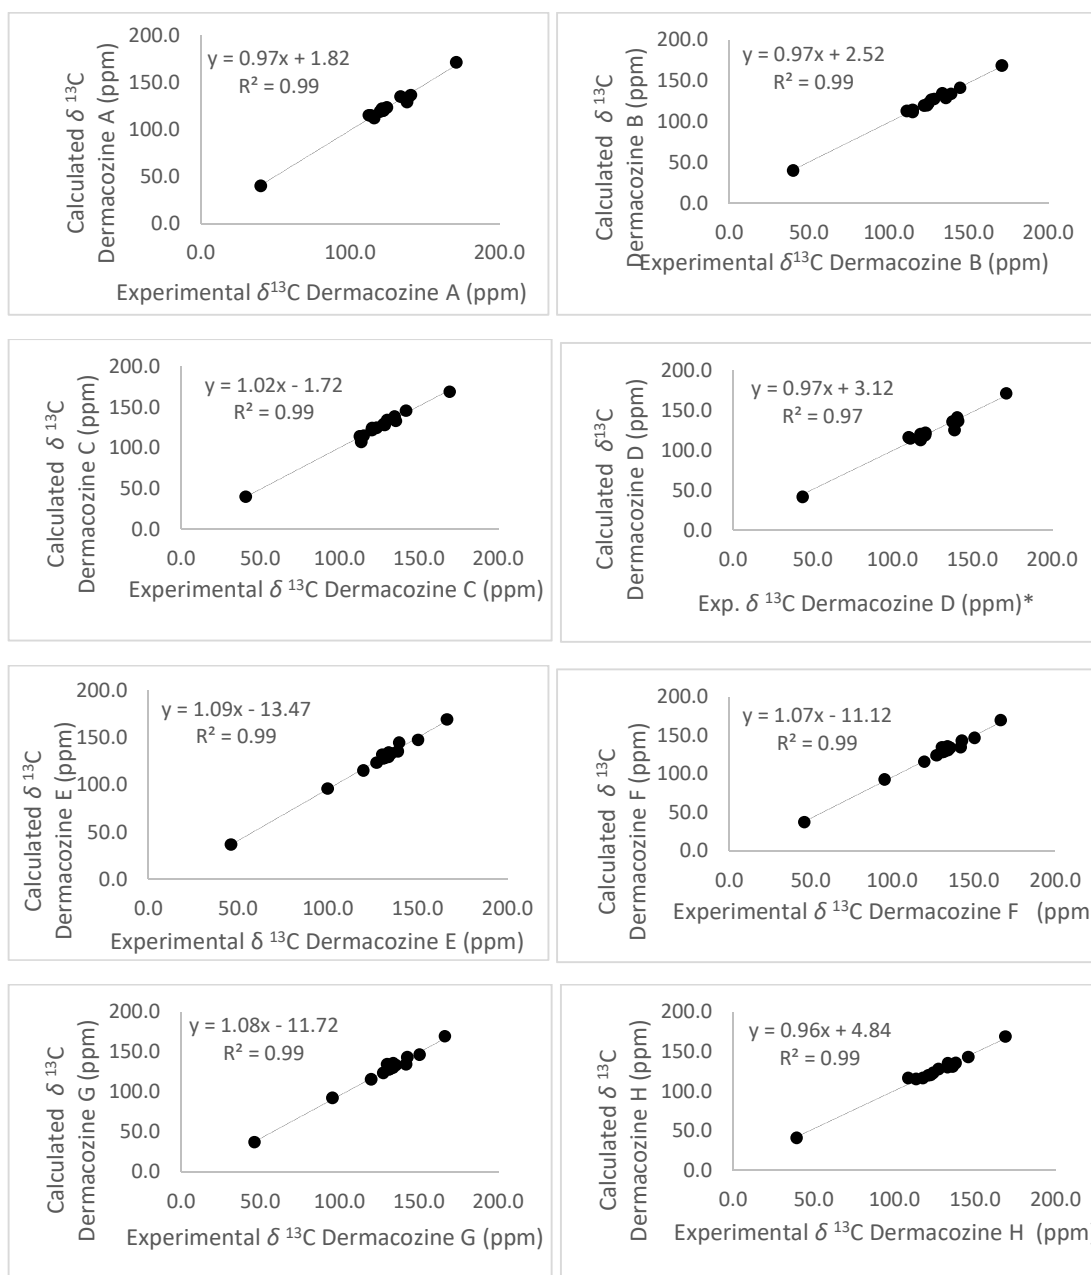

**Figure 39.** Linear regression graphics between ACD Labs (Neural Network Algorithm) calculated vs. experimental  $^{13}\text{C}$ -NMR  $\delta$  values of dermacozine A-H (4-11)

\*Dermacozine D experimental values were recorded in Chloroform-*d*.

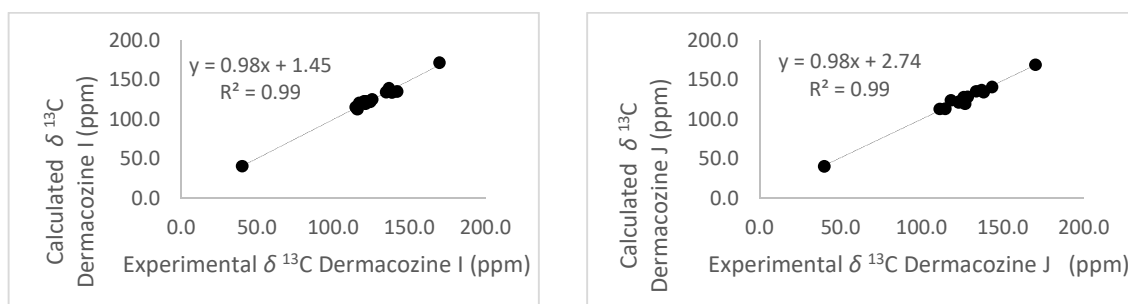

**Figure 40.** Linear regression graphics between ACD Labs (Neural Network Algorithm) calculated vs. experimental  $^{13}\text{C}$ -NMR  $\delta$  values of dermacozine I & J (12-13)

| Atom Number | Experimental $\delta$<br>$^{13}\text{C}$ Dermacozine N | Calculated $\delta$ $^{13}\text{C}$<br>Structure A | Calculated $\delta$ $^{13}\text{C}$<br>Structure D | Calculated $\delta$ $^{13}\text{C}$<br>Structure E | Calculated $\delta$ $^{13}\text{C}$<br>Structure G | Calculated $\delta$ $^{13}\text{C}$<br>Structure H | Calculated $\delta$ $^{13}\text{C}$<br>Structure I | Calculated $\delta$ $^{13}\text{C}$<br>Structure J | Calculated $\delta$ $^{13}\text{C}$<br>Structure K | Calculated $\delta$ $^{13}\text{C}$<br>Structure N | Calculated $\delta$ $^{13}\text{C}$<br>Structure P | Calculated $\delta$ $^{13}\text{C}$<br>Structure Q | Calculated $\delta$ $^{13}\text{C}$<br>Structure V | Calculated $\delta$ $^{13}\text{C}$<br>Structure W |
|-------------|--------------------------------------------------------|----------------------------------------------------|----------------------------------------------------|----------------------------------------------------|----------------------------------------------------|----------------------------------------------------|----------------------------------------------------|----------------------------------------------------|----------------------------------------------------|----------------------------------------------------|----------------------------------------------------|----------------------------------------------------|----------------------------------------------------|----------------------------------------------------|
| 1           | 128.9                                                  | 129.1                                              | 128.9                                              | 129.3                                              | 128.9                                              | 129.0                                              | 128.7                                              | 129.1                                              | 129.2                                              | 129.0                                              | 129.3                                              | 129.4                                              | 128.8                                              | 129.1                                              |
| 2           | 125.9                                                  | 123.7                                              | 124.6                                              | 122.8                                              | 124.6                                              | 123.3                                              | 123.7                                              | 123.7                                              | 124.6                                              | 123.3                                              | 122.8                                              | 124.4                                              | 124.6                                              | 123.7                                              |
| 3           | 128.4                                                  | 126.7                                              | 127.3                                              | 128.2                                              | 127.3                                              | 128.9                                              | 126.5                                              | 126.7                                              | 128.9                                              | 128.9                                              | 128.2                                              | 128.2                                              | 127.4                                              | 128.2                                              |
| 4           | 118.0                                                  | 115.4                                              | 113.6                                              | 116.5                                              | 113.7                                              | 115.8                                              | 116.6                                              | 115.5                                              | 115.1                                              | 115.8                                              | 116.5                                              | 115.0                                              | 115.0                                              | 116.5                                              |
| 4a          | 134.4                                                  | 134.8                                              | 134.8                                              | 131.0                                              | 134.7                                              | 131.6                                              | 134.4                                              | 134.7                                              | 133.7                                              | 131.6                                              | 131.0                                              | 135.5                                              | 133.9                                              | 131.0                                              |
| 5a          | 135.5                                                  | 124.3                                              | 120.8                                              | 132.0                                              | 127.0                                              | 134.2                                              | 132.5                                              | 132.1                                              | 132.1                                              | 134.2                                              | 132.0                                              | 135.5                                              | 131.5                                              | 138.9                                              |
| 6           | 109.8                                                  | 127.3                                              | 134.6                                              | 110.0                                              | 139.4                                              | 109.3                                              | 97.2                                               | 135.0                                              | 104.4                                              | 103.0                                              | 127.0                                              | 115.5                                              | 99.3                                               | 103.4                                              |
| 7           | 148.1                                                  | 144.9                                              | 151.0                                              | 130.7                                              | 116.6                                              | 122.8                                              | 144.8                                              | 104.5                                              | 122.4                                              | 113.8                                              | 115.2                                              | 123.6                                              | 151.7                                              | 146.3                                              |
| 8           | 149.8                                                  | 133.0                                              | 128.0                                              | 125.6                                              | 119.5                                              | 122.0                                              | 128.9                                              | 134.8                                              | 151.2                                              | 141.2                                              | 146.8                                              | 156.2                                              | 121.8                                              | 150.1                                              |
| 9           | 105.9                                                  | 131.9                                              | 124.4                                              | 145.3                                              | 132.1                                              | 146.6                                              | 131.9                                              | 133.9                                              | 110.3                                              | 144.7                                              | 142.5                                              | 112.7                                              | 134.4                                              | 109.0                                              |
| 9a          | 151.6                                                  | 150.6                                              | 138.0                                              | 136.0                                              | 135.8                                              | 133.1                                              | 151.4                                              | 146.1                                              | 135.5                                              | 137.4                                              | 143.3                                              | 143.1                                              | 143.6                                              | 151.9                                              |
| 10a         | 135.1                                                  | 134.3                                              | 135.9                                              | 133.5                                              | 136.5                                              | 134.5                                              | 133.9                                              | 134.7                                              | 135.1                                              | 134.5                                              | 133.5                                              | 133.9                                              | 135.6                                              | 134.3                                              |
| 11          | 166.3                                                  | 169.3                                              | 168.4                                              | 168.8                                              | 168.4                                              | 168.7                                              | 169.3                                              | 169.3                                              | 168.4                                              | 168.7                                              | 168.8                                              | 168.5                                              | 168.4                                              | 169.3                                              |
| 15          | 148.3                                                  | 148.8                                              | 145.3                                              | 152.5                                              | 140.3                                              | 152.4                                              | 152.5                                              | 142.5                                              | 145.3                                              | 143.4                                              | 144.1                                              | 147.7                                              | 154.7                                              | 144.1                                              |
| 16          | 115.0                                                  | 115.9                                              | 116.2                                              | 118.3                                              | 115.7                                              | 118.0                                              | 116.9                                              | 116.6                                              | 114.1                                              | 116.2                                              | 116.8                                              | 115.9                                              | 117.3                                              | 116.8                                              |
| 17          | 127.9                                                  | 128.1                                              | 126.8                                              | 131.5                                              | 128.5                                              | 131.6                                              | 128.1                                              | 129.6                                              | 129.2                                              | 131.6                                              | 131.5                                              | 129.0                                              | 126.8                                              | 131.5                                              |
| 18          | 125.3                                                  | 125.9                                              | 123.7                                              | 126.7                                              | 126.1                                              | 125.8                                              | 124.4                                              | 123.6                                              | 126.2                                              | 124.7                                              | 124.5                                              | 125.7                                              | 124.3                                              | 125.9                                              |
| 19          | 127.2                                                  | 125.4                                              | 127.2                                              | 123.7                                              | 121.9                                              | 126.5                                              | 127.2                                              | 132.7                                              | 128.2                                              | 126.8                                              | 126.0                                              | 131.0                                              | 127.4                                              | 125.4                                              |
| 20          | 134.8                                                  | 135.4                                              | 132.3                                              | 119.7                                              | 131.3                                              | 121.9                                              | 121.2                                              | 121.8                                              | 125.4                                              | 134.9                                              | 135.0                                              | 117.9                                              | 118.3                                              | 135.4                                              |
| 21          | 39.5                                                   | 37.2                                               | 36.8                                               | 36.5                                               | 36.8                                               | 34.2                                               | 37.1                                               | 37.2                                               | 33.6                                               | 34.2                                               | 36.5                                               | 36.1                                               | 36.8                                               | 36.5                                               |

**Table S2.** Comparison between the experimental  $^{13}\text{C}$ -NMR  $\delta$  values of dermacozine N (1) vs. the calculated ones of possible structures A, D, E, G, H, I, J, K, N, P, Q, V, W by ACD Labs (Neural Network Algorithm, DMSO- $d_6$ )

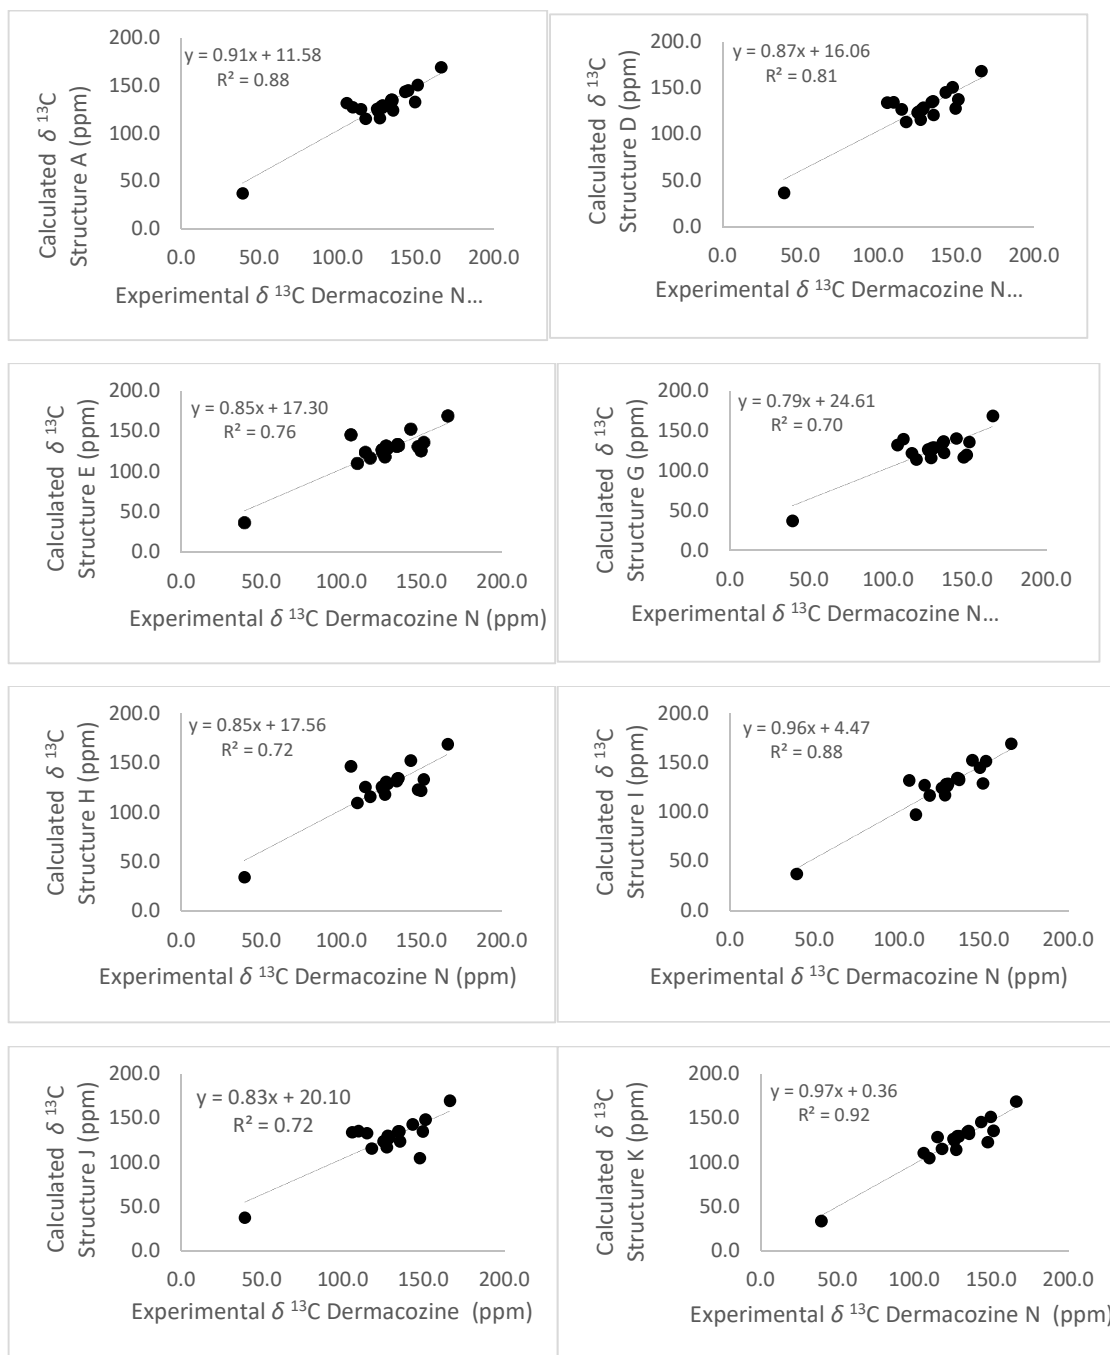

**Figure S41.** Linear regression graphics between  $^{13}\text{C}$ -NMR  $\delta$  experimental values of dermacozine N (**1**) vs. the ACD Labs calculated ones (Neural Network Algorithm,  $\text{DMSO}-d_6$ ) (**4**–**13**)

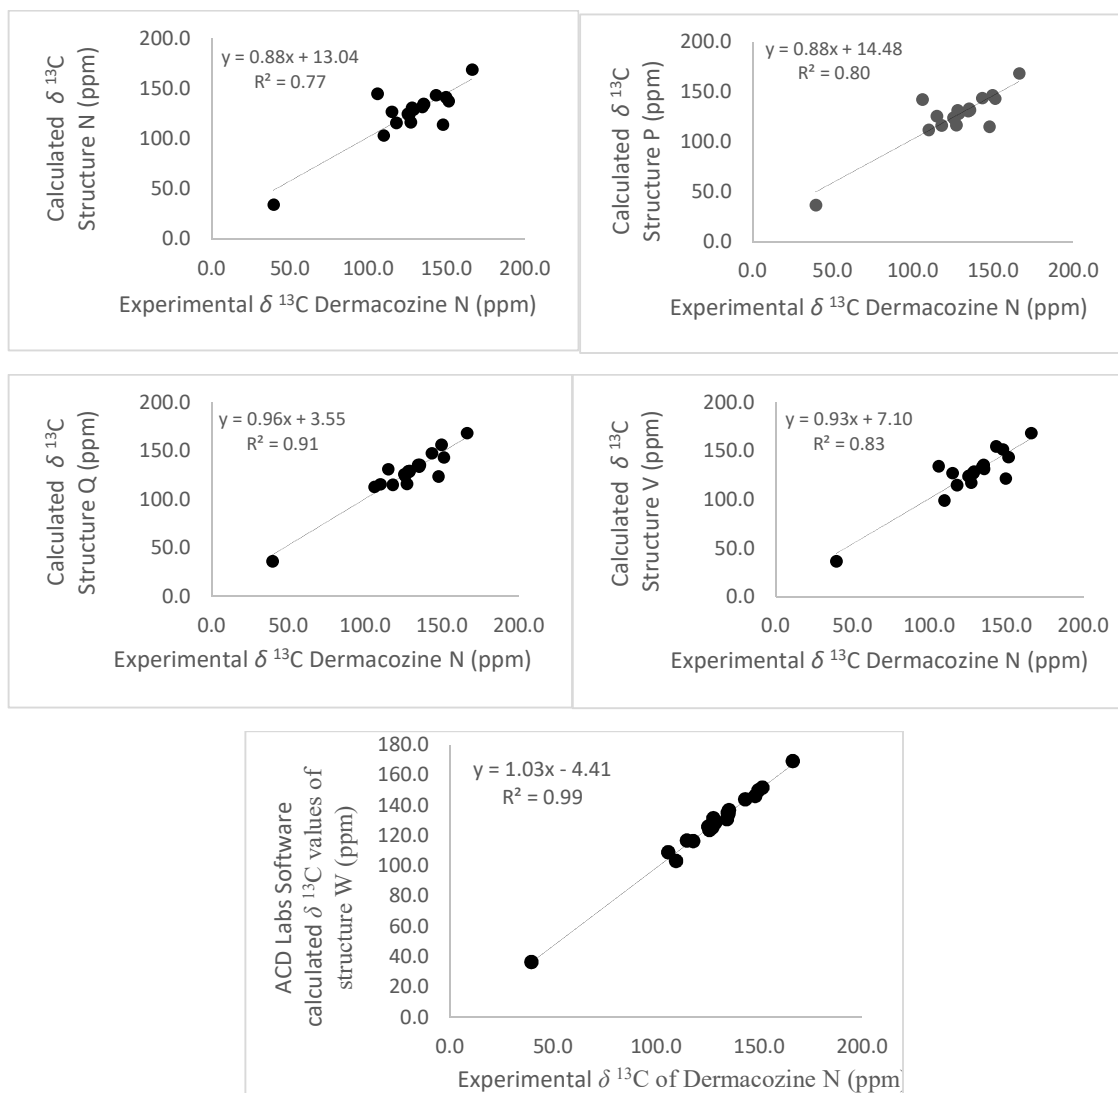

**Figure S42.** Linear regression graphics between  $^{13}\text{C}$ -NMR  $\delta$  experimental values of dermacozine N (**1**) vs. the ACD Labs (Neural Network Algorithm,  $\text{DMSO}-d_6$ ) calculated ones for possible structures N, P, Q, V, W



| Dermacozine N<br>Atom Numbers | Experimental $\delta^{13}\text{C}$<br>Dermacozine N | Calculated $\delta^{13}\text{C}$<br>Structure<br>W | Absolute error<br>between the<br>Experimental<br>and Calculated<br>data points<br>(ppm) | Standard<br>Deviation<br>from the<br>mean(* $\sigma$ ) |
|-------------------------------|-----------------------------------------------------|----------------------------------------------------|-----------------------------------------------------------------------------------------|--------------------------------------------------------|
| 1                             | 128.9                                               | 129.1                                              | -0.2                                                                                    | -0.1                                                   |
| 2                             | 125.9                                               | 123.7                                              | 2.2                                                                                     | 0.9                                                    |
| 3                             | 128.4                                               | 128.2                                              | 0.2                                                                                     | 0.1                                                    |
| 4                             | 118                                                 | 116.5                                              | 1.5                                                                                     | 0.6                                                    |
| 4a                            | 134.4                                               | 131                                                | 3.4                                                                                     | 1.4                                                    |
| 5a                            | 135.5                                               | 136.9                                              | -1.4                                                                                    | -0.6                                                   |
| 6                             | 109.8                                               | 103.4                                              | 6.4                                                                                     | 2.7                                                    |
| 7                             | 148.1                                               | 146.3                                              | 1.8                                                                                     | 0.7                                                    |
| 8                             | 149.8                                               | 150.1                                              | -0.3                                                                                    | -0.1                                                   |
| 9                             | 105.9                                               | 109                                                | -3.1                                                                                    | -1.3                                                   |
| 9a                            | 151.6                                               | 151.9                                              | -0.3                                                                                    | -0.1                                                   |
| 10a                           | 135.1                                               | 134.3                                              | 0.8                                                                                     | 0.3                                                    |
| 11                            | 166.3                                               | 169.3                                              | -3                                                                                      | -1.3                                                   |
| 15                            | 143.3                                               | 144.1                                              | -0.8                                                                                    | -0.3                                                   |
| 16                            | 115                                                 | 116.8                                              | -1.8                                                                                    | -0.7                                                   |
| 17                            | 127.9                                               | 131.5                                              | -3.6                                                                                    | -1.5                                                   |
| 18                            | 125.3                                               | 125.9                                              | -0.6                                                                                    | -0.3                                                   |
| 19                            | 127.2                                               | 125.4                                              | 1.8                                                                                     | 0.7                                                    |
| 20                            | 134.8                                               | 135.4                                              | -0.6                                                                                    | -0.2                                                   |
| 20                            | 134.8                                               | 135.4                                              | -0.6                                                                                    | -0.2                                                   |
| 21                            | 39.5                                                | 36.5                                               | 3                                                                                       | 1.3                                                    |

**Table S3.** Absolute Error and the standard deviation of the error from the mean between the calculated (Structure **W**) and the experimental dermacozine N (**1**)  $^{13}\text{C}$ -NMR chemical shifts

| Nr. | Dermacozine E (8) $\delta$<br>$^{13}\text{C}$ | Dermacozine F (9) $\delta$<br>$^{13}\text{C}$ | Dermacozine G (10) $\delta$<br>$^{13}\text{C}$ | Dermacozine O (2) $\delta$<br>$^{13}\text{C}$ |
|-----|-----------------------------------------------|-----------------------------------------------|------------------------------------------------|-----------------------------------------------|
| 1   | 131.7                                         | 131.9                                         | 131.8                                          | 129.6                                         |
| 2   | 127.1                                         | 127.2                                         | 127.3                                          | 126.6                                         |
| 3   | 130.7                                         | 130.9                                         | 130.9                                          | 131.3                                         |
| 4   | 119.6                                         | 119.5                                         | 119.7                                          | 120.3                                         |
| 4a  | 133.7                                         | 133.8                                         | 133.6                                          | 134.0                                         |
| 5a  | 139.0                                         | 141.9                                         | 141.7                                          | 139.5                                         |
| 6   | 99.8                                          | 95.2                                          | 95.4                                           | 100.4                                         |
| 7   | 139.6                                         | 142.7                                         | 142.5                                          | 139.6                                         |
| 8   | 133.8                                         | 134.0                                         | 133.7                                          | 134.5                                         |
| 9   | 130.2                                         | 130.4                                         | 129.9                                          | 129.7                                         |
| 9a  | 150.2                                         | 150.4                                         | 150.3                                          | 150.6                                         |
| 10a | 135.2                                         | 135.4                                         | 135.4                                          | 135.3                                         |
| 11  | 166.2                                         | 166.4                                         | 166.3                                          | 167.2                                         |
| 16  | 121.7                                         | 119.7                                         | 119.8                                          | 122.6                                         |
| 17  | 134.2                                         | 134.5                                         | 124.3                                          | 134.1                                         |
| 18  | 131.2                                         | 131.4                                         | 132.3                                          | 131.3                                         |
| 19  | 128.1                                         | 128.3                                         | 115.2                                          | 128.2                                         |
| 20  | 127.7                                         | 127.9                                         | 158.3                                          | 127.9                                         |
| 21  | 128.1                                         | 128.3                                         | 115.2                                          | 128.2                                         |
| 22  | 131.2                                         | 131.4                                         | 132.3                                          | 131.3                                         |
| 23  | 45.9                                          | 46.0                                          | 46.3                                           | 45.9                                          |

**Table S4.** Experimental values of  $^{13}\text{C}$ -NMR  $\delta$  chemical shifts of dermacozines E (8), F (9), G (9) and O (2) for multiple regression and t-test

| SUMMARY OUTPUT                  |                    |                       |               |                |                       |                  |                    |
|---------------------------------|--------------------|-----------------------|---------------|----------------|-----------------------|------------------|--------------------|
|                                 |                    |                       |               |                |                       |                  |                    |
| <i>Regression Statistics</i>    |                    |                       |               |                |                       |                  |                    |
| Multiple R                      | 0.999602           |                       |               |                |                       |                  |                    |
| R Square                        | 0.999205           |                       |               |                |                       |                  |                    |
| Adjusted R Square               | 0.999064           |                       |               |                |                       |                  |                    |
| Standard Error                  | 0.687836           |                       |               |                |                       |                  |                    |
| Observations                    | 21                 |                       |               |                |                       |                  |                    |
|                                 |                    |                       |               |                |                       |                  |                    |
| ANOVA                           |                    |                       |               |                |                       |                  |                    |
|                                 | <i>df</i>          | <i>SS</i>             | <i>MS</i>     | <i>F</i>       | <i>Significance F</i> |                  |                    |
| Regression                      | 3                  | 10105.71              | 3368.569      | 7119.931       | 1.55E-26              |                  |                    |
| Residual                        | 17                 | 8.043009              | 0.473118      |                |                       |                  |                    |
| Total                           | 20                 | 10113.75              |               |                |                       |                  |                    |
|                                 |                    |                       |               |                |                       |                  |                    |
|                                 | <i>Coefficient</i> | <i>Standard Error</i> | <i>t Stat</i> | <i>P-value</i> | <i>Lower 95%</i>      | <i>Upper 95%</i> | <i>Lower 95.0%</i> |
| Intercept                       | -0.44071           | 0.939796              | -0.46895      | 0.645066       | -2.42351              | 1.542083         | -2.42351           |
| Dermacozine E (8) $\delta$ 13C  | 1.107188           | 0.113396              | 9.763937      | 2.19E-08       | 0.867944              | 1.346432         | 0.867944           |
| Dermacozine F (9) $\delta$ 13C  | -0.1067            | 0.11218               | -0.95118      | 0.354841       | -0.34338              | 0.129976         | -0.34338           |
| Dermacozine G (10) $\delta$ 13C | 0.00425            | 0.018576              | 0.22881       | 0.821746       | -0.03494              | 0.043442         | -0.03494           |

### Hypotheses:

**H<sub>0</sub>:**(null hypothesis) = the structure of dermacozine E (8) and/or dermacozine F (9) and/or dermacozine G (10) are not showing significant similarity to dermacozine O (2) ( $\delta_c$  values of dermacozine E and/or dermacozine F and/or dermacozine G are independent on the corresponding  $\delta_c$  values of dermacozine O).

**H<sub>a</sub>:**(alternative hypothesis) = the structure of dermacozine E (8) and/or dermacozine F (9) and/or dermacozine G (10) are showing significant similarity to dermacozine O (2) ( $\delta_c$  values of dermacozine E and/or dermacozine F and/or dermacozine G are dependent on the corresponding  $\delta_c$  values Dermacozine O).

**Hypothesis testing:**

$df$  (degrees of freedom) =  $n$ (number of  $\delta_c$  compared)- $p$ (number of dependent variables)-1 = 17

$\alpha = .05$

CI = 95%

$t_{\alpha/2}$  rejection region (**RR**) (two tailed t-test table value) =  $t_{\alpha/2} \leq -2.11$  and  $+2.11 \leq t_{\alpha/2}$

$t_{\alpha/2}$  values calculated, multiple regression algorithm:

$t_{\alpha/2}$  calculated value for the  $\delta_c$  values in ppm of dermacozine E (**8**) = + 9.76;

$t_{\alpha/2}$  calculated value for the  $\delta_c$  values in ppm of dermacozine F (**9**) = - 0.95;

$t_{\alpha/2}$  calculated value for the  $\delta_c$  values in ppm of dermacozine G (**10**) = + 0.23;

As for dermacozine F (**9**) and dermacozine G (**10**), (calculated)  $t_{\alpha/2}$  is between - 2.11 and +2.11(two tailed t-test table value for  $\alpha = .05$ ;  $df = 17$ ), which is essentially means that  $- t_{\alpha/2}$  (t-test table value) <  $t_{\alpha/2}$  dermacozine F (**9**) (calculated) <  $+ t_{\alpha/2}$  (t-test table value) and  $- t_{\alpha/2}$ (t-test table value) <  $t_{\alpha/2}$  dermacozine G (**10**) (calculated) <  $+ t_{\alpha/2}$  (t-test table value). (Calculated  $t_{\alpha/2}$  values for both molecules are not within the **RR** region of the t-test distribution). Therefore, we cannot reject the null hypothesis for dermacozine F (**9**) and dermacozine G (**10**). As a consequence, the  $\delta_c$  values of these compounds are independent on the  $\delta_c$  values of the structure of dermacozine O (**2**). However, when we were investigating  $t_{\alpha/2}$  of dermacozine E (**8**) (calculated) – where there is only one substituent difference, an  $-NH_2$  difference at position C-11 of which can change carbon shifts compared to corresponding carbon shifts in dermacozine O (**2**), we can see that  $+ 9.76 t_{\alpha/2}$  (calculated  $t_{\alpha/2}$  dermacozine E)  $\gg + 2.11 t_{\alpha/2}$  t(two tailed t-test table value). Therefore,  $t_{\alpha/2}$  (calculated  $t_{\alpha/2}$  dermacozine E (**8**)) falls into the rejection

*Bertalan Juhasz et al.*

region (RR) of the t-distribution, and as a consequence, we can reject the null hypothesis for dermacozine E (8) and we can accept the alternative hypothesis.

#### **Conclusion of hypothesis testing:**

The  $\delta_c$  values of dermacozine O (2) significantly dependent on dermacozine E (8). Therefore, we can conclude at 95% Confidence Level that the structure of dermacozine E (8) is the most similar structure to dermacozine O (2) among the structures of dermacozine E (8), F (9) and G (10), based on their corresponding  $\delta_c$  values investigated with multiple regression and a two-tailed t-test.

**Figure S43.** Multiple regression analysis between the experimental  $^{13}\text{C}$ -NMR  $\delta$  values of dermacozines E (8), F (9), G (9) as independent variables and those of dermacozine O (2) as dependent variables

| RESIDUAL<br>OUTPUT |                                                                                           |                  |
|--------------------|-------------------------------------------------------------------------------------------|------------------|
|                    |                                                                                           |                  |
| <i>Observation</i> | <i>Predicted<br/>Dermacozine O (2)<br/><math>\delta</math> <math>^{13}\text{C}</math></i> | <i>Residuals</i> |
| 1                  | 131.9                                                                                     | -2.3             |
| 2                  | 127.3                                                                                     | -0.7             |
| 3                  | 130.9                                                                                     | 0.4              |
| 4                  | 119.7                                                                                     | 0.6              |
| 5                  | 133.9                                                                                     | 0.1              |
| 6                  | 138.9                                                                                     | 0.6              |
| 7                  | 100.3                                                                                     | 0.1              |
| 8                  | 139.5                                                                                     | 0.1              |
| 9                  | 134.0                                                                                     | 0.5              |
| 10                 | 130.4                                                                                     | -0.7             |
| 11                 | 150.4                                                                                     | 0.2              |
| 12                 | 135.4                                                                                     | -0.1             |
| 13                 | 166.5                                                                                     | 0.7              |
| 14                 | 122.0                                                                                     | 0.6              |
| 15                 | 134.3                                                                                     | -0.2             |
| 16                 | 131.4                                                                                     | -0.1             |
| 17                 | 128.2                                                                                     | 0.0              |
| 18                 | 128.0                                                                                     | -0.1             |
| 19                 | 128.2                                                                                     | 0.0              |
| 20                 | 131.4                                                                                     | -0.1             |
| 21                 | 45.7                                                                                      | 0.2              |

**Table S5.** Residuals between the observed and predicted values of  $^{13}\text{C}$ -NMR  $\delta$  of dermacozines E (8), F (9), G (9) as independent variables and those of dermacozine O (2) as dependent variables

| Atom Number | Experimental $\delta$<br>$^{13}\text{C}$ values of<br>Dermacozine P | ACD Labs<br>Calculated<br>(Neural Network<br>Algorithm) $\delta$ $^{13}\text{C}$<br>values of<br>Dermacozine P |
|-------------|---------------------------------------------------------------------|----------------------------------------------------------------------------------------------------------------|
| 1           | 131.5                                                               | 127.8                                                                                                          |
| 2           | 134.9                                                               | 135.7                                                                                                          |
| 3           | 132.4                                                               | 130.3                                                                                                          |
| 4           | 132.6                                                               | 127.7                                                                                                          |
| 4a          | 142.4                                                               | 143.6                                                                                                          |
| 5a          | 140.7                                                               | 142.6                                                                                                          |
| 7           | 135.1                                                               | 131.2                                                                                                          |
| 9           | 131.3                                                               | 131.0                                                                                                          |
| 10a         | 142.4                                                               | 140.5                                                                                                          |
| 11          | 165.5                                                               | 167.3                                                                                                          |
| 13          | 166.6                                                               | 164.8                                                                                                          |
| 15          | 194.4                                                               | 192.1                                                                                                          |
| 16          | 136.3                                                               | 139.4                                                                                                          |
| 17          | 130.0                                                               | 129.9                                                                                                          |
| 18          | 128.7                                                               | 128.4                                                                                                          |
| 19          | 133.5                                                               | 132.2                                                                                                          |
| 20          | 128.7                                                               | 128.4                                                                                                          |

**Table S6.** Comparison between experimental and the ACD Labs calculated  $^{13}\text{C}$ -NMR  $\delta$  chemical shift values of dermacozines P (3) (Neural Network Algorithm, DMSO- $d_6$ )

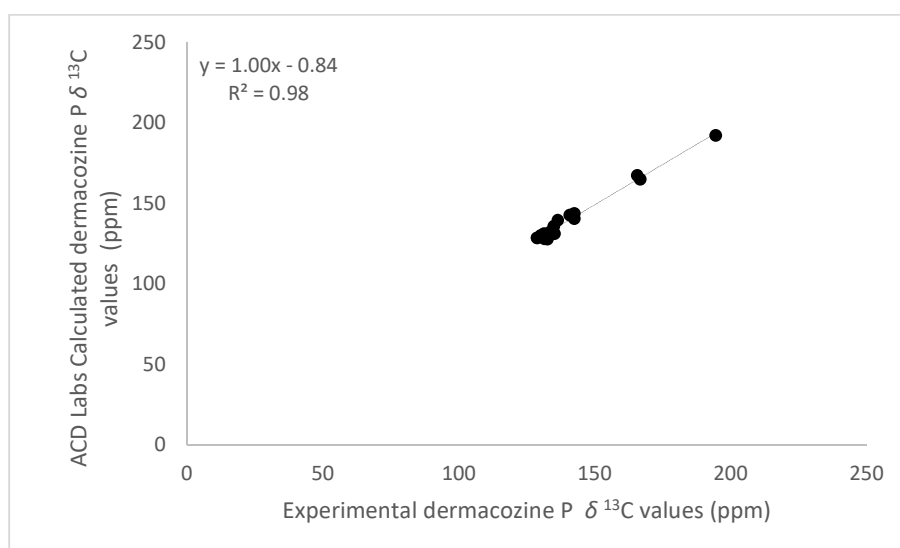

**Figure S44.** Linear regression graphics between the experimental  $^{13}\text{C}$ -NMR  $\delta$  chemical shifts of dermacozine P (**3**) and the ACD Labs calculated  $^{13}\text{C}$ -NMR  $\delta$  values (Neural Network Algorithm,  $\text{DMSO}-d_6$ )



| Atom Number | Experimental $\delta^{13}\text{C}$ values of Dermacozine P | ACD Labs Calculated (Neural Network Algorithm) $\delta^{13}\text{C}$ values of Dermacozine P | Absolute Error (ppm) | Standard Deviation from the mean(* $\sigma$ ) |
|-------------|------------------------------------------------------------|----------------------------------------------------------------------------------------------|----------------------|-----------------------------------------------|
| 1           | 131.5                                                      | 127.8                                                                                        | 3.7                  | 1.7                                           |
| 2           | 134.9                                                      | 135.7                                                                                        | -0.8                 | -0.4                                          |
| 3           | 132.4                                                      | 130.3                                                                                        | 2.1                  | 1.0                                           |
| 4           | 132.6                                                      | 127.7                                                                                        | 4.9                  | 2.2                                           |
| 4a          | 142.4                                                      | 143.6                                                                                        | -1.2                 | -0.5                                          |
| 5a          | 140.7                                                      | 142.6                                                                                        | -1.9                 | -0.9                                          |
| 7           | 131.3                                                      | 131.2                                                                                        | 0.1                  | 0.0                                           |
| 9           | 135.1                                                      | 131                                                                                          | 4.1                  | 1.9                                           |
| 10a         | 142.4                                                      | 140.5                                                                                        | 1.9                  | 0.9                                           |
| 11          | 165.5                                                      | 167.3                                                                                        | -1.8                 | -0.8                                          |
| 13          | 166.6                                                      | 164.8                                                                                        | 1.8                  | 0.8                                           |
| 15          | 194.4                                                      | 192.1                                                                                        | 2.3                  | 1.0                                           |
| 16          | 136.3                                                      | 139.4                                                                                        | -3.1                 | -1.4                                          |
| 17          | 130                                                        | 129.9                                                                                        | 0.1                  | 0.0                                           |
| 18          | 128.7                                                      | 128.4                                                                                        | 0.3                  | 0.1                                           |
| 19          | 133.5                                                      | 132.2                                                                                        | 1.3                  | 0.6                                           |
| 20          | 128.7                                                      | 128.4                                                                                        | 0.3                  | 0.1                                           |

**Table S7.** Absolute Error and the standard deviation of the error from the mean between the calculated and the experimental dermacozine P (**3**)  $^{13}\text{C}$ -NMR chemical shifts

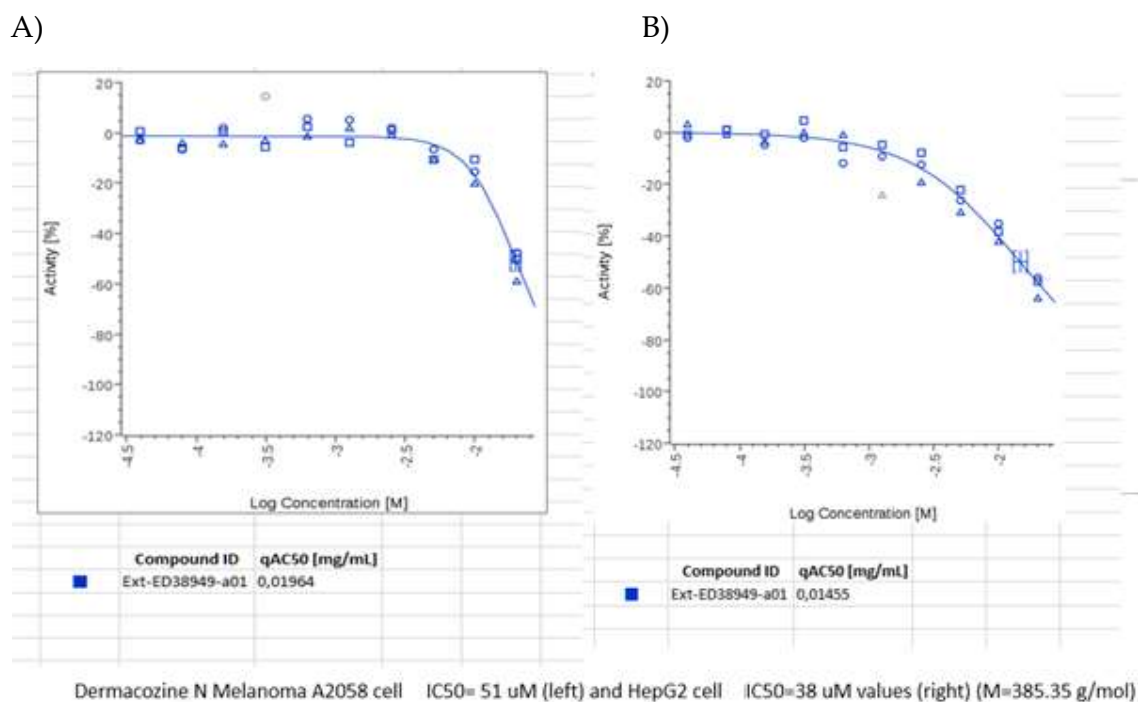

**Figure S45.** Evaluation of the cytotoxic activity of dermacozine N (1) against human A) Melanoma (A2058) and B) Hepatocellular carcinoma (HepG2) cell lines (IC<sub>50</sub> graphs)

Bertalan Juhasz et al.

| No. | Dermacozine N (1)     |                                     |            |              |              |
|-----|-----------------------|-------------------------------------|------------|--------------|--------------|
|     | $\delta_C$ , mult     | $\delta_H$ , mult ( <i>J</i> in Hz) | HMBC       | COSY         | NOESY        |
| 1   | 128.9, C              |                                     | 3          |              |              |
| 2   | 125.9, CH             | 7.88 (dd, 7.6, 1.3)                 | 4          | 3            |              |
| 3   | 128.4, CH             | 7.47 (td, 8.3, 7.6)                 |            | 4, 2         |              |
| 4   | 118.0, CH             | 7.55 (dd, 8.3, 1.3)                 | 2          | 3            |              |
| 4a  | 134.4, C              |                                     | 3, 23      |              |              |
| 5a  | 135.5, C              |                                     | 9, 23      |              |              |
| 6   | 109.8, C              |                                     | 14         |              |              |
| 7   | 148.1, C              |                                     | 9          |              |              |
| 8   | 149.8, C              |                                     | 9          |              |              |
| 9   | 105.9, CH             | 6.79, s                             |            |              | 12.A, 12.B   |
| 9a  | 151.6, C              |                                     | 9          |              |              |
| 10a | 135.1, C              |                                     | 2, 4       |              |              |
| 11  | 166.3, C              |                                     | 2          |              |              |
| 12  |                       | A 7.70, brs<br>B 9.31, brs          |            | 12.B<br>12.A | 12.B<br>12.A |
| 13  | 168.3, C <sup>†</sup> |                                     |            |              |              |
| 14  |                       | A 7.65, brs<br>B 7.98, brs          |            | 14.B<br>14.A | 14.B<br>14.A |
| 15  | 143.3, C              |                                     | 16, 17, 19 |              |              |
| 16  | 115.0, CH             | 7.12 (dd, 7.6, 1.5)                 | 18         | 17           |              |
| 17  | 127.9, CH             | 7.19 (ddd, 7.6, 7.4, 1.6)           | 19         | 16, 18       |              |
| 18  | 125.3, CH             | 7.15 (ddd, 7.6, 7.4, 1.5)           | 16         | 17, 19       |              |
| 19  | 127.2, CH             | 7.30 (dd, 7.6, 1.6)                 | 17         | 19           |              |
| 20  | 134.8, C              |                                     | 16, 18     |              |              |
| 21  |                       |                                     |            |              |              |
| 22  |                       |                                     |            |              |              |
| 23  | 39.5, CH <sub>3</sub> | 3.68, s                             |            |              | 4            |

**Table S8.** Experimental NMR spectroscopic data for dermacozine N (1) with HMBC, COSY and NOESY correlations (800 MHz, DMSO-*d*<sub>6</sub>)

<sup>†</sup>: Calculated with ACD Labs Software, Neural Network Algorithm, DMSO-*d*<sub>6</sub> (Chemical shift is not observed)

Bertalan Juhasz et al.

| No. | Dermacozine O (2)     |                             |               |           |
|-----|-----------------------|-----------------------------|---------------|-----------|
|     | $\delta_C$ , mult     | $\delta_H$ , mult (J in Hz) | HMBC          | COSY      |
| 1   | 129.6, C              |                             | 3             |           |
| 2   | 126.6, CH             | 7.87 (dd, 7.5, 1.1)         | 4             | 3         |
| 3   | 131.3, CH             | 7.78 (td, 8.5, 7.5)         |               | 2, 4      |
| 4   | 120.3, CH             | 7.97 (dd, 8.5, 1.1)         | 2             | 3         |
| 4a  | 134.0, C              |                             | 3, 23         |           |
| 5a  | 139.5, C              |                             | 9, 23         |           |
| 6   | 100.4, C              |                             | 8, 14         |           |
| 7   | 139.6, C              |                             | 8, 9          |           |
| 8   | 134.5, CH             | 7.21 (d, 9.7)               |               | 9         |
| 9   | 129.7, CH             | 7.24 (d, 9.7)               |               | 8         |
| 9a  | 150.6, C              |                             | 8, 9          |           |
| 10a | 135.3, C              |                             | 2, 4          |           |
| 11  | 167.2, C              |                             | 2             |           |
| 12  |                       | COOH, not observed          |               |           |
| 13  | 163.6, C <sup>†</sup> |                             |               |           |
| 14  |                       | 11.27, bs                   |               |           |
| 15  | 163.1, C <sup>†</sup> |                             |               |           |
| 16  | 122.6, C              |                             | 8, 14, 18, 22 |           |
| 17  | 134.1, C              |                             | 19, 21        |           |
| 18  | 131.3, CH             | 7.30 (dd, 7.4, 1.3)         | 19, 20        | 19/21     |
| 19  | 128.2, CH             | 7.47 (td, 7.4, 1.3)         | 18, 21        | 18/22, 20 |
| 20  | 127.9, CH             | 7.41 (td, 7.4, 1.3)         | 18, 21        | 19, 21    |
| 21  | 128.2, CH             | 7.47 (td, 7.4, 1.3)         | 19, 22        | 18/22, 20 |
| 22  | 131.3, CH             | 7.30 (dd, 7.4, 1.3)         | 20, 21        | 21/19     |
| 23  | 45.9, CH <sub>3</sub> | 3.67, s                     |               |           |

**Table S9.** Experimental NMR spectroscopic data for dermacozine O (2) with HMBC and COSY correlations (800 MHz, DMSO-*d*<sub>6</sub>)

<sup>†</sup>: Calculated with ACD Labs Software, Neural Network Algorithm, DMSO-*d*<sub>6</sub> (Chemical shift is not observed)

Bertalan Juhasz et al.

| No. | Dermacozine P (3)     |                             |                |           |                                             |
|-----|-----------------------|-----------------------------|----------------|-----------|---------------------------------------------|
|     | $\delta_C$ , mult     | $\delta_H$ , mult (J in Hz) | HMBC           | COSY      | Selective-<br>NOESY, irradi. at<br>8.03 ppm |
| 1   | 131.5, C              |                             | 3              |           |                                             |
| 2   | 134.9, CH             | 8.74 (dd, 7.0, 1.3)         | 4              | 3         |                                             |
| 3   | 132.4, CH             | 8.21 (td, 7.0, 8.6)         |                | 4, 2      |                                             |
| 4   | 132.6, CH             | 8.55 (dd, 8.6, 1.3)         | 2              | 3         |                                             |
| 4a  | 142.4, C              |                             | 3              |           |                                             |
| 5a  | 140.7, C              |                             | 7, 9           |           |                                             |
| 6   | 129.8, C <sup>†</sup> |                             |                |           |                                             |
| 7   | 131.3, CH             | 8.65 (d, 1.9)               | 9              |           |                                             |
| 8   | 135.6, C <sup>†</sup> |                             |                |           |                                             |
| 9   | 135.1, CH             | 8.95 (d, 1.9)               | 7              |           |                                             |
| 9a  | 144.0, C <sup>†</sup> |                             |                |           |                                             |
| 10a | 141.2, C              |                             | 2, 4           |           |                                             |
| 11  | 165.5, C              |                             |                |           |                                             |
| 12  |                       | COOH,<br>not observed       |                |           |                                             |
| 13  | 166.6, C              |                             | 7              |           |                                             |
| 14  |                       | A 8.03, brs<br>B 9.47, brs  |                |           | 17/21                                       |
| 15  | 194.4, C              |                             | 9, 17, 21      |           |                                             |
| 16  | 136.3, C              |                             | 17, 18, 20, 21 |           |                                             |
| 17  | 130.0, CH             | 7.95 (dd, 7.6, 1.3)         | 18, 19         | 18/20     |                                             |
| 18  | 128.7, CH             | 7.66 (td, 7.6, 1.3)         | 20             | 19, 17/21 |                                             |
| 19  | 133.5, CH             | 7.78 (td, 7.6, 1.3)         | 17, 21         | 18/20     |                                             |
| 20  | 128.7, CH             | 7.66 (td, 7.6, 1.3)         | 18             | 19, 17/21 |                                             |
| 21  | 130.0, CH             | 7.95 (dd, 7.6, 1.3)         | 17, 19         | 18/20     |                                             |
| 22  |                       |                             |                |           |                                             |
| 23  | -                     | -                           | -              | -         |                                             |

**Table S10.** Experimental NMR spectroscopic data for dermacozine P (3) with HMBC and COSY correlations (600 MHz, DMSO-*d*<sub>6</sub>)

<sup>†</sup>: Calculated with ACD Labs Software, Neural Network Algorithm, DMSO-*d*<sub>6</sub> (Chemical shift is not observed)

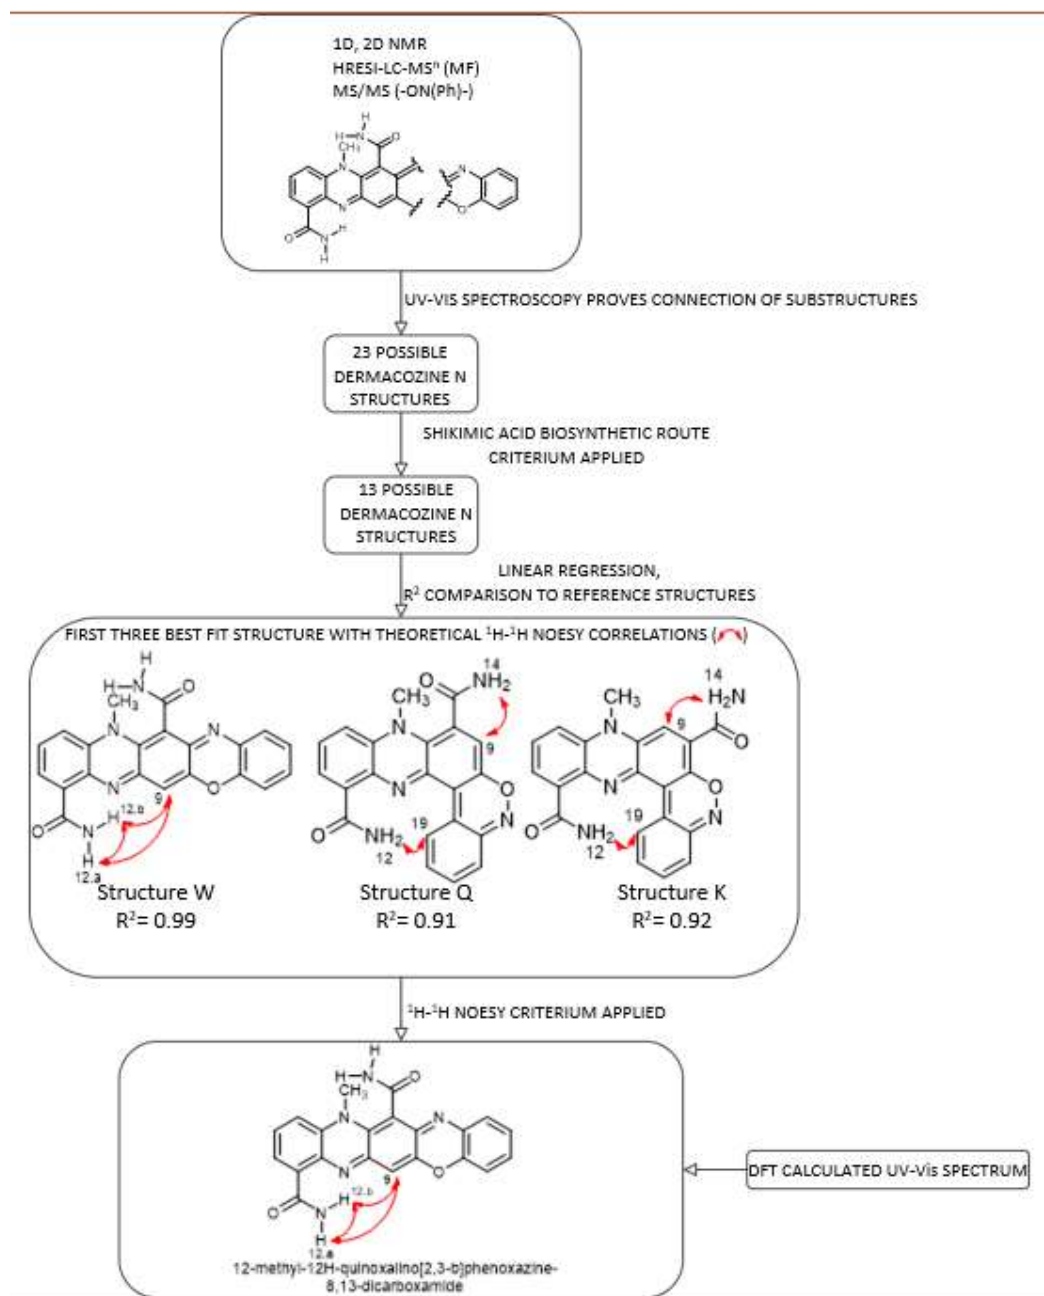

**Figure S46.** Workflow of dermacozine N (1) structure determination

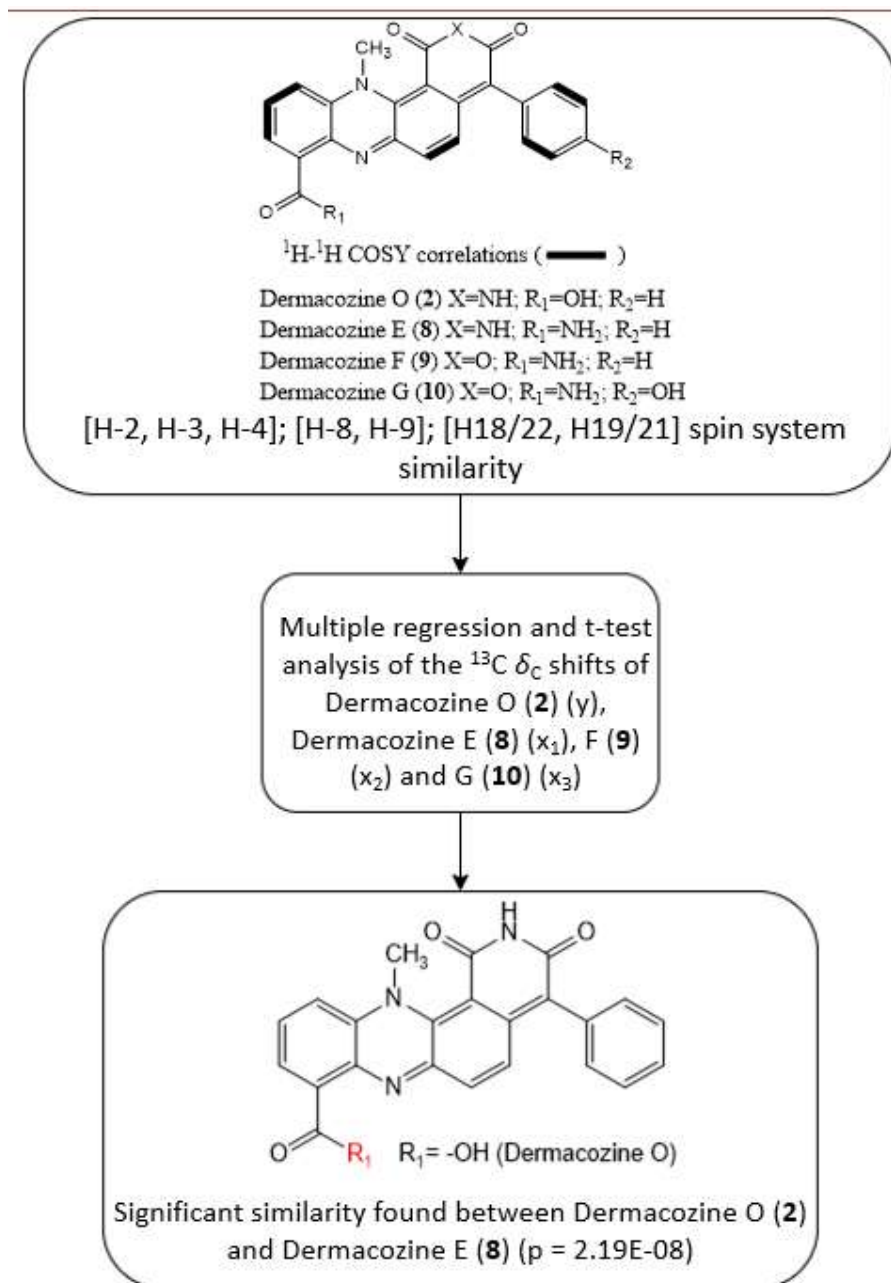

**Figure S47.** Workflow of dermacozine O (2) structure determination.

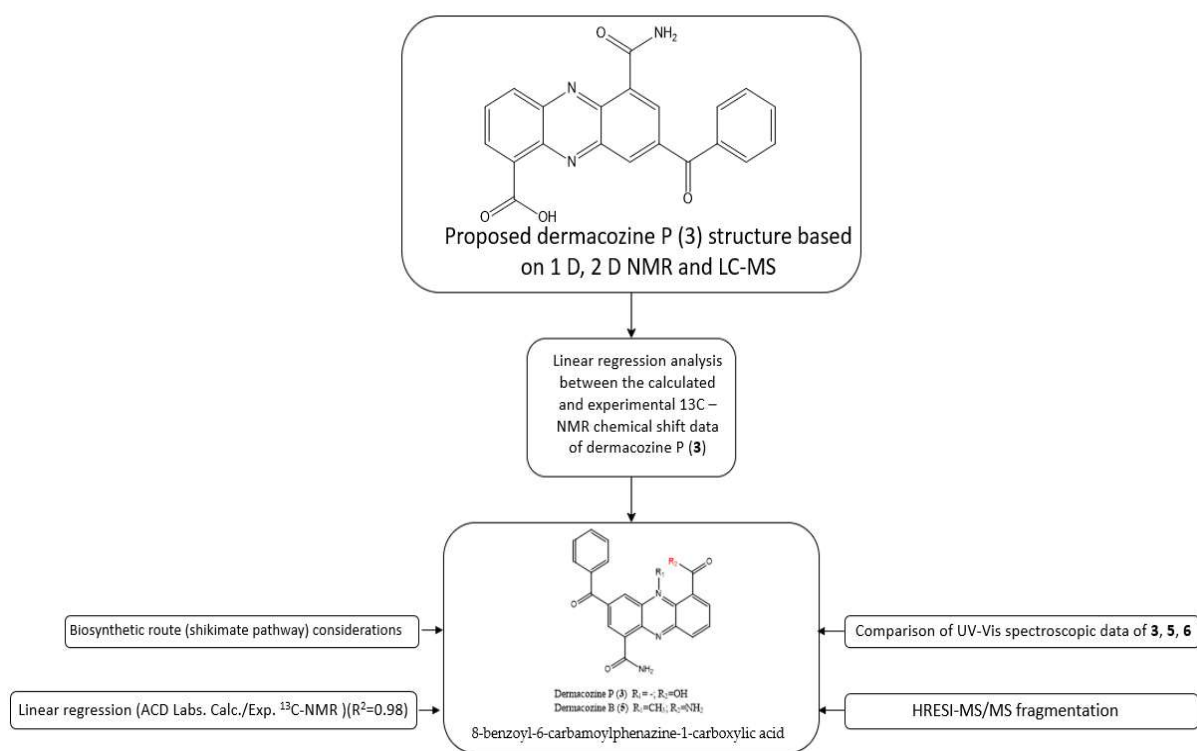

**Figure S48.** Workflow of dermacozine P (3) structure determination



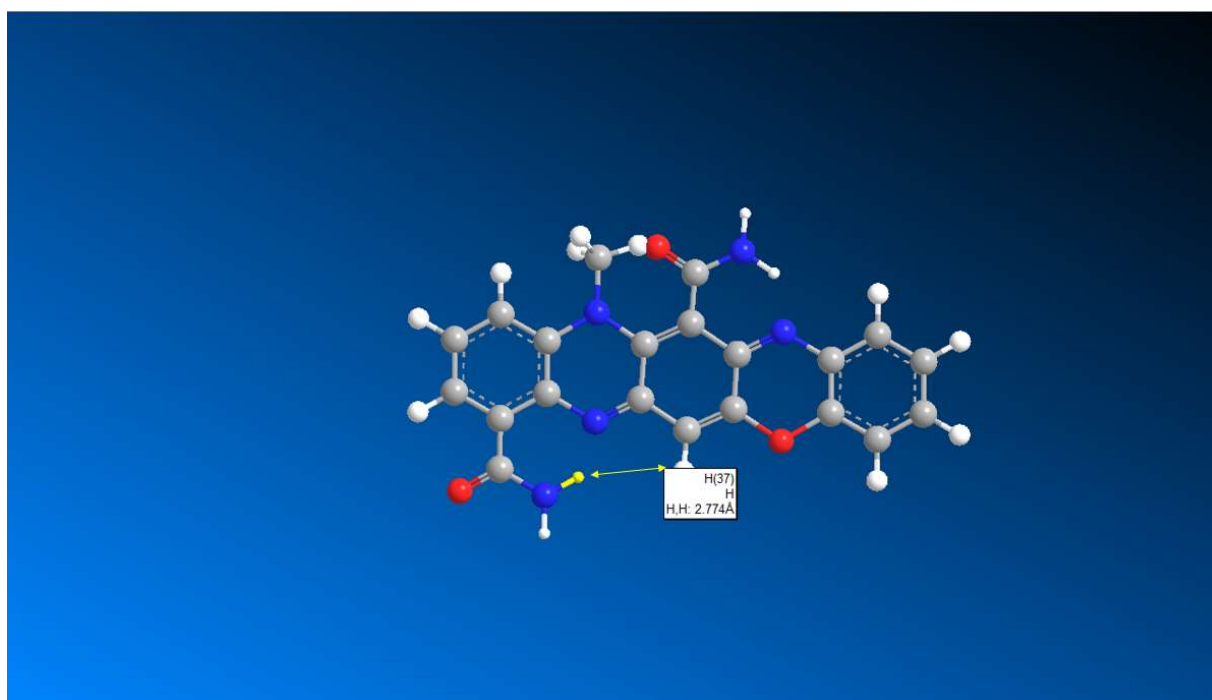

**Theme S1.** Dermacozine N (1) H-9 and NH<sub>2</sub>-12 distance (Modelled with Chemdraw, Chem 3D)

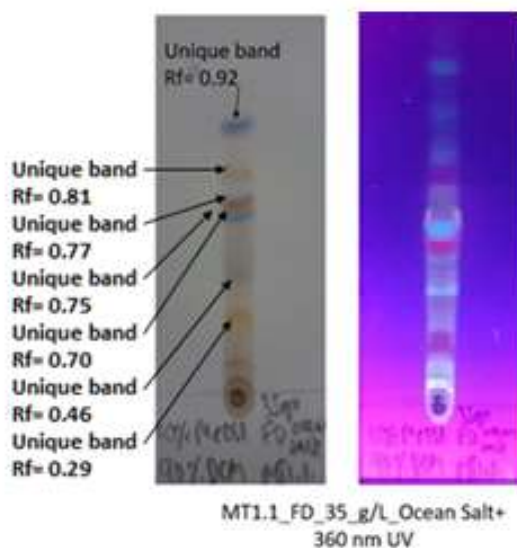

**Theme S2.** TLC plate of the initial FD fraction following Kupchan liquid-liquid partitioning, showing the colorful bands where the dermacozines were isolated from (left) and the same TLC plate under UV 360 nm light (right)

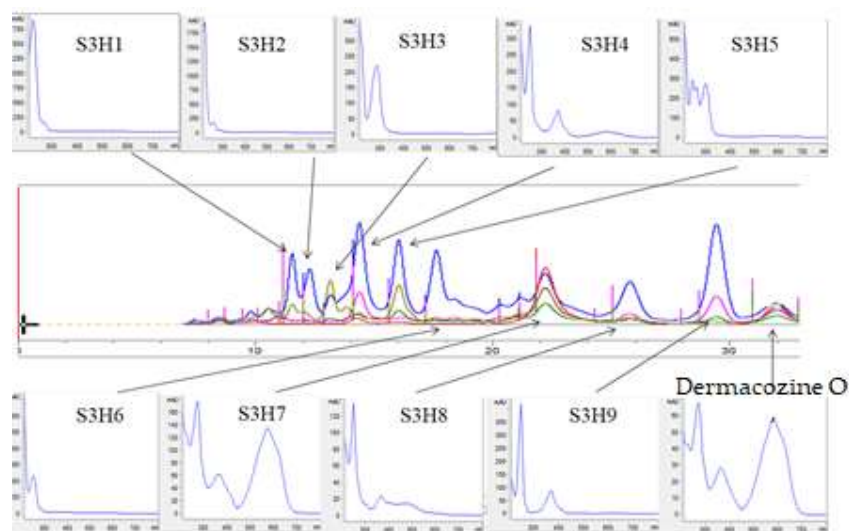

**Theme S3.** HPLC chromatogram for the isolation of dermacozine O (2)

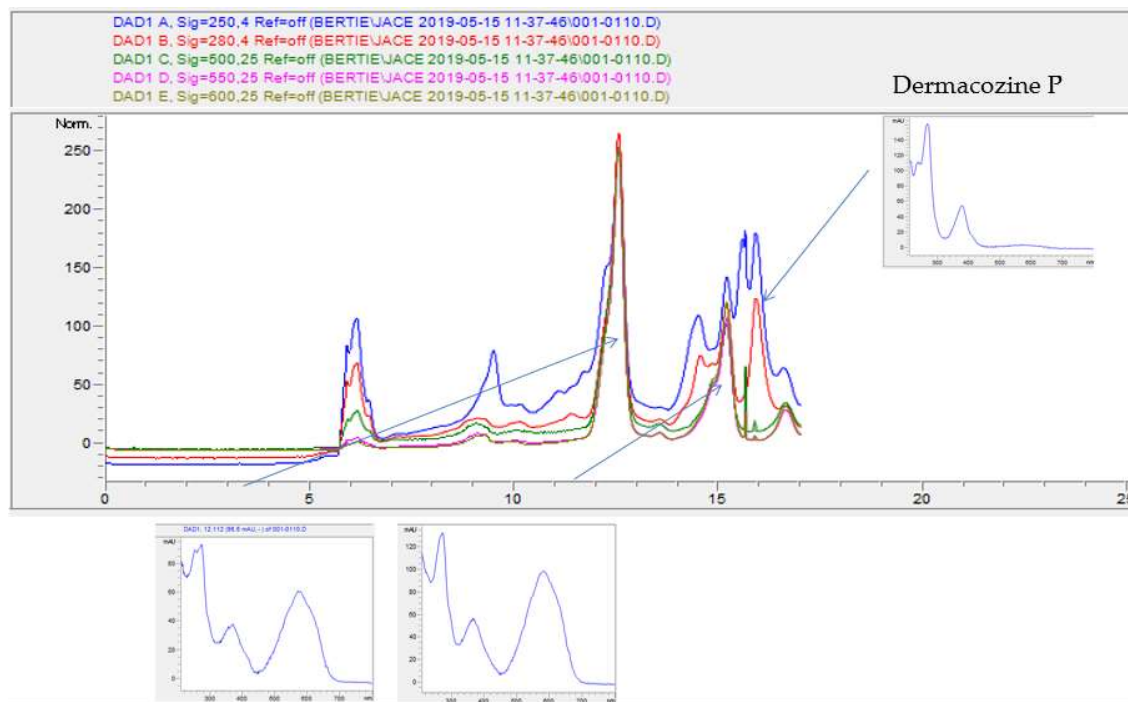

**Theme S4.** HPLC chromatogram for the isolation of dermacozine P (3)
